# Supplementary material for: Ruthenium bistridentate complexes with non-symmetrical hexahydro-pyrimidopyrimidine ligands: a structural and theoretical investigation of their optical and electrochemical properties
Source: Royal Society of Chemistry journal article supplement (doi:10.1039/c6dt02408d), 2016-01-01
Supplement: c6dt02408d1.pdf [file c6dt02408d1.pdf]

## Supporting Information

# Ruthenium Bistridentate Complexes with Non-Symmetrical Hexahydro-pyrimidopyrimidine Ligands: A Structural and Theoretical Investigation of their Optical and Electrochemical Properties.

Baptiste Laramée-Milette and Garry S. Hanan\*

\* Département de Chimie, Pavillon J.-A. Bombardier, 5155 Chemin de la Rampe, Université de Montréal, Montréal, Québec, Canada, H3T 2B1.

### Contents

|                                                                                           |       |
|-------------------------------------------------------------------------------------------|-------|
| 1. Experimental .....                                                                     | 2-4   |
| 2. Supplementary data .....                                                               | 5-37  |
| i. Solid state characterization and DFT/TD-DFT results for metal complex <b>4</b> .....   | 5-10  |
| ii. DFT/TD-DFT results for metal complex <b>5</b> .....                                   | 11-15 |
| iii. Solid state characterization and DFT/TD-DFT results for metal complex <b>6</b> ..... | 16-21 |
| iv. Solid state characterization and DFT/TD-DFT results for metal complex <b>7</b> .....  | 22-26 |
| v. DFT/TD-DFT results for metal complex <b>8</b> .....                                    | 27-30 |
| vi. DFT/TD-DFT results for metal complex <b>9</b> .....                                   | 30-36 |
| vii. Ru(II)/Ru(III) redox potential comparison.....                                       | 37    |
| viii. UV-vis comparison between the experimental and theoretical spectrum.....            | 38    |
| ix. Luminescence spectra recorded at ambient temperature in deaerated MeCN.....           | 39    |
| 3. References.....                                                                        | 39    |

# 1. Experimental

## Materials and Instrumentations

All solvents and reagents were used as purchased without further purification before the reactions.  $\text{RuCl}_3 \cdot 3\text{H}_2\text{O}$  was purchased from Pressure Chemical Corporation. All other reagents were purchased from Sigma-Aldrich. ACS grade solvents were purchased from VWR and Fisher. Nuclear magnetic resonance (NMR) spectra were recorded in  $\text{CD}_2\text{Cl}_2$ ,  $\text{CDCl}_3$  and  $\text{CD}_3\text{CN}$  at  $25^\circ\text{C}$  on a Bruker AV-400 spectrometer at 400 MHz for  $^1\text{H}$  NMR and at 100 MHz for  $^{13}\text{C}$  NMR. Chemical shifts ( $\delta$ ) are reported in parts per million (ppm) relative to TMS, and are referenced to the residual solvent signal ( $\delta = 1.94$  ppm for acetonitrile- $d_3$ , 5.32 ppm for methylene chloride- $d_2$  and 7.26 ppm for chloroform- $d_1$ ). The high-resolution mass spectrometry (HR-MS) experiments were performed on a Bruker Daltonics microTOF spectrometer using electrospray ionization. Absorption and emission spectra were measured in deaerated spectrograde solvent at room temperature on a Cary 300 UV-Vis-NIR Spectrophotometer from Agilent Technologies and a Cary Eclipse Fluorescence Spectrophotometer, respectively. For the luminescence lifetimes, an Edinburgh OB 900 single-photon-counting spectrometer was used, employing a Hamamatsu PLP2 laser diode as pulse (wavelength output, 408 nm; pulse width, 59 ps).

Electrochemical measurements were carried out in argon-purged acetonitrile at room temperature with a BAS CV50W multipurpose potentiostat. The working electrode was a glassy carbon electrode. The counter electrode was a Pt wire, and the pseudo-reference electrode was a silver wire. The reference was set using an internal 1 mM ferrocene/ferrocenium sample at  $E_{1/2} = 400$  mV vs SCE in dry acetonitrile.<sup>[1]</sup> The concentration of the compounds was of about 1 mM. Tetrabutylammonium hexafluorophosphate (TBAP) was used as the supporting electrolyte and its concentration was 0.10 M. Cyclic voltammograms were obtained at scan rates of 50, 100, 200, and 500 mV/s. For reversible processes, half-wave potentials (vs SCE) were measured with square-wave voltammetry (SW) experiments performed with a step rate of 4 mV, an amplitude of 25 mV and a frequency of 15 Hz. For irreversible reduction processes, the cathodic peak was used as  $E$ . The criteria for reversibility were the close to unity ratio of the intensities of the cathodic and anodic currents, and the constancy of the peak potential on changing scan rate. Experimental uncertainties are as follows: absorption maxima,  $\pm 2$  nm; molar absorption coefficient, 10%; emission maxima,  $\pm 5$  nm; excited state lifetimes, 10%; redox potentials,  $\pm 10$  mV. The microanalyses were performed at the Elemental Analysis Service of the Université de Montréal.

## Synthesis of the ligands and metal complexes

$\text{Ru}(\text{DMSO})_4\text{Cl}_2$ ,<sup>[2]</sup> 6-bromo-2,2'-bipyridine,<sup>[3]</sup> 2-chloro-1,10-phenanthroline<sup>[4]</sup> and (4'-phenyl-2,2':6',2''-terpyridine) $\text{RuCl}_3$ <sup>[5]</sup> were synthesized as previously described. Solvents were removed under reduced pressure using a rotary evaporator unless otherwise stated.

### 2,2'-bipyridyl-6-hpp (bpyG, 1)

A 100 mL oven-dried round-bottomed flask was charged with ( $\pm$ )BINAP (16 mg, 3 mol% with respect to 6-bromo-2,2'-bipyridine) under an inert  $\text{N}_2$ -atmosphere. Dry toluene (10 mL) was added to the flask and the resulting mixture was left at  $60^\circ\text{C}$  to give a clear colourless solution. The solution was cooled to room temperature and  $\text{Pd}(\text{OAc})_2$  catalyst (3.8 mg, 2 mol% with respect to 6-bromo-2,2'-bipyridine) was added to the flask, leading to a clear dark red solution after 5-10 minutes. To this solution was added 6-bromo-2,2'-bipyridine (200 mg, 0.85 mmol) and the mixture was heated at  $60^\circ\text{C}$  for 20 minutes, while a color change from red to yellow could be observed. To the resulting solution was added H-hpp (130 mg, 0.94 mmol) and potassium *tert*-butoxide (240 mg, 2.13 mmol) and the resulting brownish-green solution was heated at  $90^\circ\text{C}$  for 3 hours. After this time, the reaction mixture was cooled to room temperature and the solvent was evaporated to dryness. The residue was suspended in 25 mL of an ether:toluene (60:10 v/v) mixture and filtered. The filtrate was evaporated to dryness. The residue was subject to a purification over deactivated neutral alumina, using a mixture of methylene chloride and ethanol in a 95:5 ratio, affording a pure white solid (110 mg, 45%).

$^1\text{H}$  NMR (400 MHz,  $\text{CD}_2\text{Cl}_2$ ):  $\delta$  (ppm) = 8.64 (d,  $J = 5$  Hz, 1H), 8.15 (m, 2H), 7.97 (t,  $J = 8$  Hz, 1H), 7.82 (t,  $J = 7$  Hz, 1H), 7.48 (d,  $J = 8$  Hz, 1H), 7.32 (d,  $J = 8$  Hz, 1H), 3.97 (t,  $J = 6$  Hz, 2H), 3.62 (m, 4H), 3.50 (t,  $J = 6$  Hz, 2H), 2.27 (quint,  $J = 6$  Hz, 2H), 2.07 (quint,  $J = 6$  Hz, 2H).  $^{13}\text{C}$  NMR (100 MHz,  $\text{CD}_2\text{Cl}_2$ ):  $\delta$  (ppm) = 153.9, 153.7, 152.5, 150.2, 148.8, 140.3, 136.7, 123.7, 120.6, 118.5, 117.5, 47.7, 47.3, 46.3, 38.2, 20.6, 19.5. HRMS (ESI):  $m/z$   $[\text{M}+\text{H}]^+$  calcd for  $\text{C}_{17}\text{H}_{19}\text{N}_5$ : 294.17132; found: 294.17265; difference: 4.52 ppm

### 2-hpp-1,10-phenanthroline (phenG, 2)

Synthesized from 2-chloro-1,10-phenanthroline by following the procedure described above for 1. (825 mg, 87%).

$^1\text{H}$  NMR (400 MHz,  $\text{CDCl}_3$ ):  $\delta$  (ppm) = 12.60 (s, 1H), 9.05 (dd,  $J = 4.3$  Hz, 1H), 8.40 (d,  $J = 8.8$  Hz, 1H), 8.26 (dd,  $J = 8.2$  Hz, 1H), 7.94 (d,  $J = 8.8$  Hz, 1H), 7.76 (q,  $J = 8.8$  Hz, 2H), 7.65 (dd,  $J = 8.1$  Hz, 1H), 4.31 (t,  $J = 6.0$  Hz, 2H), 3.80 (t,  $J = 6.0$  Hz, 2H), 3.72 (t,  $J = 6.0$  Hz, 2H), 2.38 (quin,  $J = 6.0$  Hz, 2H), 2.20 (quin,  $J = 6.0$  Hz, 2H), 1.21 (t,  $J = 7.0$ , 1H).  $^{13}\text{C}$  NMR (100 MHz,  $\text{CDCl}_3$ ):  $\delta$  (ppm) = 153.7, 151.6, 150.6, 144.4, 142.4, 140.5, 136.4, 129.4, 126.6, 125.8, 123.8, 115.8, 49.0, 48.2, 46.9, 39.2, 21.4, 20.1. HRMS (ESI):  $m/z$   $[\text{M}+\text{H}]^+$  calcd for  $\text{C}_{19}\text{H}_{19}\text{N}_5$ : 318.17132; found: 318.17161; difference: 0.91 ppm

### 8-(6-bromo-2-pyridinyl)quinolone

A 20 mL microwave vial was charged with 8-quinolinylboronic acid (75 mg, 0.43 mmol), 2,6-dibromopyridine (405 mg, 1.71 mmol), potassium carbonate (340 mg, 2.45 mmol), Pd<sub>2</sub>(dba)<sub>3</sub> (7.5 mg, 2 mol%), SPhos (6.6 mg, 4 mol%) and 20 mL of a MeCN:H<sub>2</sub>O (2:1) solution. The biphasic mixture was degassed for 5 minutes with argon. The mixture was left under microwave heating (400W, 80°C) for 10 minutes. The resulting yellowish solution was extracted 4 times with methylene chloride and the organic layer was evaporated to dryness. The residue was subject to a purification by flash chromatography, using a mixture of hexanes:ethyl acetate (90:10) as the eluent. The fraction containing the desired product were combined and evaporated under reduced pressure, yielding a white solid (25 mg, 20%)

<sup>1</sup>H NMR (400 MHz, CDCl<sub>3</sub>): δ (ppm) = 8.95 (dd, J = 2 Hz, 1H), 8.21 (t, J = 8 Hz, 3H), 7.89 (dd, J = 1 Hz, 1H), 7.66 (t, J = 8 Hz, 2H), 7.49 (d, J = 8 Hz, 1H), 7.44 (dd, J = 4 Hz, 1H). <sup>13</sup>C NMR (100 MHz, CD<sub>2</sub>Cl<sub>2</sub>): δ (ppm) = 157.8, 150.3, 145.6, 141.5, 137.8, 136.9, 136.5, 131.6, 129.3, 128.5, 126.5, 126.3, 125.9, 121.1.

### 2-hpp-6-quinolylpyridine (QpyG, 3)

Synthesized from 8-(6-bromo-2-pyridinyl)quinolone by following the procedure described above for 1. (825 mg, 87%)

<sup>1</sup>H NMR (400 MHz, CDCl<sub>3</sub>): δ (ppm) = 8.89 (dd, J = 2 Hz, 1H), 8.27 (dd, J = 2 Hz, 1H), 8.05 (t, J = 8 Hz, 1H), 7.95 (dd, J = 1 Hz, 1H), 7.91 (dd, J = 1 Hz, 1H), 7.66 (t, J = 7 Hz, 1H), 7.62 (d, J = 7 Hz, 1H), 7.55 (d, J = 8 Hz, 1H), 7.48 (dd, J = 4 Hz, 1H), 4.08 (t, J = 6 Hz, 2H), 3.68 (t, J = 6 Hz, 2H), 3.60 (t, J = 6 Hz, 2H), 3.51 (dt, J = 6 Hz, 2H), 2.29 (quint, J = 6 Hz, 2H), 2.11 (quint, J = 6 Hz, 2H). <sup>13</sup>C NMR (100 MHz, CD<sub>2</sub>Cl<sub>2</sub>): δ (ppm) = 156.1, 153.4, 151.0, 150.7, 145.6, 141.0, 137.2, 136.9, 131.1, 130.0, 129.1, 126.6, 123.2, 121.7, 115.8, 48.5, 48.2, 47.4, 46.9, 21.2, 20.1. HRMS (ESI): m/z [M+H]<sup>+</sup> calcd for C<sub>21</sub>H<sub>21</sub>N<sub>5</sub>: 344.18697; found: 344.18649; difference: 1.39 ppm

### mer-[Ru(bpyG)<sub>2</sub>][(PF<sub>6</sub>)<sub>2</sub>] (4)

A 20 mL microwave vial was charged with ligand 1 (50 mg, 0.17 mmol), Ru(DMSO)<sub>4</sub>Cl<sub>2</sub> (40.5 mg, 0.083 mmol), 4-ethylmorpholine (12 drops) and ethylene glycol (15 mL). The vial was then subjected to microwave irradiation (400W, 200°C) for 20 minutes. After this time, the resulting deep purple solution was poured into an aqueous KPF<sub>6</sub> solution (10 eq.). The resulting precipitate was filtered over paper. Recrystallization from slow diffusion of ether into an acetone solution afforded purple needles (40 mg, 50%).

<sup>1</sup>H NMR (400 MHz, CD<sub>3</sub>CN): δ (ppm) = 8.37 (d, J = 8 Hz, 2H), 8.29 (d, J = 8 Hz, 2H), 8.14 (t, J = 8 Hz, 2H), 7.80 (t, J = 8 Hz, 2H), 7.67 (d, J = 5 Hz, 2H), 7.62 (d, J = 8 Hz, 2H), 7.16 (t, J = 6 Hz, 2H), 4.04 (dt, J = 4 Hz, 2H), 4.04 (dt, J = 4 Hz, 2H), 3.37-3.30 (m, 4H), 3.14 (dt, J = 9 Hz, 2H), 3.00 (q, J = 6 Hz, 2H), 2.93 (quint, J = 6 Hz, 2H), 2.55 (dq, J = 4 Hz, 2H), 2.38 (m, 2H), 2.15 (m, 2H), 1.83 (dq, J = 4 Hz, 2H), 1.12 (m, 2H). <sup>13</sup>C NMR (100 MHz, CD<sub>3</sub>CN): δ (ppm) = 158.5, 156.5, 156.1, 153.3, 151.8, 137.0, 135.6, 125.5, 123.9, 119.0, 117.1, 49.9, 49.7, 49.1, 47.8, 30.8, 24.1, 23.7. Calc. for C<sub>34</sub>H<sub>38</sub>N<sub>10</sub>RuP<sub>2</sub>F<sub>12</sub>·(C<sub>2</sub>H<sub>5</sub>)<sub>2</sub>O: C, 43.39%; H, 4.60%; N, 13.32%. Found: C, 43.09%; H, 4.45%; N, 13.24%. HRMS (ESI): m/z [M-PF<sub>6</sub>]<sup>+</sup> calcd for C<sub>34</sub>H<sub>38</sub>N<sub>10</sub>RuPF<sub>6</sub>: 833.19695; found: 833.19864; difference: 2.03 ppm; [M-2PF<sub>6</sub>]<sup>2+</sup> calcd for C<sub>34</sub>H<sub>38</sub>N<sub>10</sub>Ru: 344.11611; found: 344.11664; difference: 1.54 ppm.

### mer-[Ru(phenG)<sub>2</sub>][(PF<sub>6</sub>)<sub>2</sub>] (5)

A 20 mL microwave vial was charged with ligand 2 (100 mg, 0.32 mmol), RuCl<sub>3</sub>·3H<sub>2</sub>O (37 mg, 0.14 mmol), 4-ethylmorpholine (12 drops) and ethylene glycol (15 mL). The vial was then subjected to microwave irradiation (400W, 200°C) for 20 minutes. After this time, the resulting deep purple solution was poured into an aqueous KPF<sub>6</sub> solution (10 eq.). The resulting precipitate was filtered over celite, washed with ethyl acetate and dissolve with a minimum amount of acetonitrile. The solvent were removed under vacuum. Recrystallization from slow diffusion of ether into an acetone solution afforded purple block (85 mg, 52%).

<sup>1</sup>H NMR (400 MHz, CD<sub>3</sub>CN): δ (ppm) = 8.73 (d, J = 9.0 Hz, 2H), 8.34 (d, J = 8.1 Hz, 2H), 8.23 (d, J = 8.8 Hz, 2H), 8.05 (d, J = 8.8 Hz, 2H), 7.97 (m, 4H), 7.45 (dd, J = 8.2 Hz, 2H), 4.30 (dt, J = 5.0 Hz, 2H), 3.60 (m, 2H), 3.42 (m, 2H), 3.14 (m, 2H), 2.95 (m, 2H), 2.81 (m, 2H), 2.71 (m, 2H), 2.46 (m, 2H), 2.22 (m, 2H), 1.84 (m, 2H), 1.31 (m, 2H), 0.78 (m, 2H). <sup>13</sup>C NMR (100 MHz, CD<sub>3</sub>CN): δ (ppm) = 154.7, 153.6, 151.3, 148.5, 147.2, 135.9, 134.9, 131.0, 127.5, 127.4, 126.9, 124.5, 117.4, 49.6, 49.5, 49.0, 48.7, 24.1, 23.1. Calc. for C<sub>38</sub>H<sub>38</sub>N<sub>10</sub>RuP<sub>2</sub>F<sub>12</sub>·C<sub>4</sub>H<sub>8</sub>O<sub>2</sub>: C, 45.29%; H, 4.16%; N, 12.57%. Found: C, 45.36%; H, 4.50%; N, 12.07%. HRMS (ESI): m/z [M-PF<sub>6</sub>]<sup>+</sup> calcd for C<sub>38</sub>H<sub>38</sub>N<sub>10</sub>RuPF<sub>6</sub>: 881.19706; found: 881.19717; difference: 0.12 ppm.

### fac-[Ru(QpyG)<sub>2</sub>][(PF<sub>6</sub>)<sub>2</sub>] (6)

A 20 mL microwave vial was charged with ligand 3 (50 mg, 0.15 mmol), RuCl<sub>3</sub>·3H<sub>2</sub>O (19 mg, 0.073 mmol), 4-ethylmorpholine (12 drops) and ethylene glycol (15 mL). The vial was then subjected to microwave irradiation (400W, 200°C) for 20 minutes. After this time, the resulting deep purple solution was poured into an aqueous KPF<sub>6</sub> solution (10 eq.). The resulting precipitate was filtered over paper. The crude mixture was purified over silica using a MeCN:H<sub>2</sub>O:NaCl sat. mixture in a 7:2:1 ratio. The major deep purple fraction was then evaporated to dryness and dissolved in a minimum amount of water. The fraction was rechromatographed using SP-Sephadex C25 cation exchanger column (1.5 cm x 35 cm) with 0.15M sodium (-)-O,O'-dibenzoyl-L-tartrate solution (pH adjusted between 8 – 9 with NaOH 4M). The major purple band was recovered and a saturated KPF<sub>6</sub> solution (10-15 mL) was added to the fraction. The product was extracted thrice with dichloromethane. The organic layer was then washed with three portions of diluted NaOH 2M in order to remove the remaining excess of (-)-O,O'-dibenzoyl-L-tartrate. Recrystallization from slow diffusion of ether into a concentrated acetonitrile solution afforded purple needles (15 mg, 19%).

$^1\text{H}$  NMR (400 MHz,  $\text{CD}_3\text{CN}$ ):  $\delta$  (ppm) = 9.67 (d,  $J$  = 8 Hz, 2H), 8.31 (d,  $J$  = 8 Hz, 2H), 7.96 (dd,  $J$  = 8 Hz, 4H), 7.61 (dd,  $J$  = 8 Hz, 2H), 7.47 (t,  $J$  = 8 Hz, 2H), 7.39 (t,  $J$  = 8 Hz, 2H), 7.31 (d,  $J$  = 8 Hz, 2H), 6.15 (d,  $J$  = 8 Hz, 2H), 4.11 (dd,  $J$  = 13 Hz, 2H), 3.69 (dt,  $J$  = 11 Hz, 2H), 3.50-3.44 (m, 4H), 3.36-3.29 (m, 4H), 3.15-3.08 (m, 6H), 1.84-1.78 (m, 3H), 1.71-1.54 (m, 3H).

$^{13}\text{C}$  NMR (100 MHz,  $\text{CD}_3\text{CN}$ ):  $\delta$  (ppm) = 160.2, 159.3, 159.0, 151.4, 148.2, 137.8, 137.6, 134.7, 131.4, 130.1, 129.3, 128.3, 123.2, 123.0, 109.8, 50.4, 49.4, 48.8, 45.9, 23.8, 22.0. Calc. for  $\text{C}_{42}\text{H}_{42}\text{N}_{10}\text{RuP}_2\text{F}_{12}\cdot 2\text{H}_2\text{O}$ : C, 45.29%; H, 4.16%; N, 12.57%. Found: C, 45.09%; H, 4.01%; N, 12.83%. HRMS (ESI):  $m/z$   $[\text{M}-\text{PF}_6]^+$  calcd for  $\text{C}_{42}\text{H}_{42}\text{N}_{10}\text{RuPF}_6$ : 933.22847; found: 933.23303; difference: 4.89 ppm;  $[\text{M}-2\text{PF}_6]^{2+}$  calcd for  $\text{C}_{42}\text{H}_{42}\text{N}_{10}\text{Ru}$ : 394.13187; found: 394.13134; difference: 1.34 ppm.

#### ***mer*-[Ru(bpyG)(phtpy)][(PF<sub>6</sub>)<sub>2</sub>] (7)**

A 20 mL microwave vial was charged with ligand 1 (35 mg, 0.12 mmol), (4'-phenyl-2,2':6',2''-terpyridine)RuCl<sub>3</sub> (66.5 mg, 0.129 mmol), 4-ethylmorpholine (12 drops) and ethylene glycol (15 mL). The vial was then subjected to microwave irradiation (400W, 200°C) for 20 minutes. After this time, the resulting orange-red solution was poured into an aqueous KPF<sub>6</sub> solution (10 eq.). The resulting precipitate was filtered over paper. The residue was purified on a silica column with a mixture of MeCN:H<sub>2</sub>O:KNO<sub>3</sub> sat. in a 7:2:1 ratio. The isolated species was subjected to a second metathesis with KPF<sub>6</sub> solution (10 eq.). The precipitate was extracted with dichloromethane and the solvent was removed under vacuum. The resulting precipitate was recrystallized by slow diffusion of ether into an acetone solution to afford orange needles (70 mg, 60%).

$^1\text{H}$  NMR (400 MHz,  $\text{CD}_3\text{CN}$ ):  $\delta$  (ppm) = 8.84 (s, 2H), 8.56 (d,  $J$  = 8 Hz, 2H), 8.42 (d,  $J$  = 8 Hz, 1H), 8.35 (d,  $J$  = 8 Hz, 1H), 8.31 (t,  $J$  = 8 Hz, 1H), 8.15 (d,  $J$  = 7 Hz, 2H), 7.97 (t,  $J$  = 8 Hz, 2H), 7.79 (d,  $J$  = 8 Hz, 1H), 7.75-7.70 (m, 3H), 7.66 (t,  $J$  = 7 Hz, 1H), 7.60 (d,  $J$  = 5 Hz, 2H), 7.33 (t,  $J$  = 7 Hz, 2H), 7.11 (d,  $J$  = 5 Hz, 1H), 7.03 (t,  $J$  = 7 Hz, 1H), 3.91 (d,  $J$  = 6 Hz, 2H), 3.30 (t,  $J$  = 7 Hz, 2H), 2.96 (t,  $J$  = 6 Hz, 2H), 2.36 (dd,  $J$  = 4 Hz, 2H), 2.14 (dd,  $J$  = 6 Hz, 2H), 1.23 (dd,  $J$  = 6 Hz, 2H).  $^{13}\text{C}$  NMR (100 MHz,  $\text{CD}_3\text{CN}$ ):  $\delta$  (ppm) = 159.2, 158.0, 157.8, 155.5, 153.5, 151.9, 147.6, 138.7, 138.3, 137.9, 136.9, 133.1, 131.1, 130.5, 130.3, 128.6, 128.4, 127.2, 124.8, 124.4, 122.3, 119.6, 49.8, 49.7, 48.9, 46.5, 30.8, 24.0, 23.1. Calc. for  $\text{C}_{38}\text{H}_{34}\text{N}_8\text{RuP}_2\text{F}_{12}\cdot \text{C}_3\text{H}_6\text{O}$ : C, 46.82%; H, 3.83%; N, 10.65%. Found: C, 46.86%; H, 3.88%; N, 10.60%. HRMS (ESI):  $m/z$   $[\text{M}-\text{PF}_6]^+$  calcd for  $\text{C}_{38}\text{H}_{34}\text{N}_8\text{RuPF}_6$ : 849.15962; found: 849.15829; difference: 1.57 ppm.

#### ***mer*-[Ru(phenG)(phtpy)][(PF<sub>6</sub>)<sub>2</sub>] (8)**

Synthesized from ligand 2 by following the procedure described above for metal complex 7. (97 mg, 48%).

$^1\text{H}$  NMR (400 MHz,  $\text{CD}_3\text{CN}$ ):  $\delta$  (ppm) = 8.90 (s, 2H), 8.87 (d,  $J$  = 9.1 Hz, 1H), 8.58 (d,  $J$  = 7.6 Hz, 2H), 8.30 (t,  $J$  = 8.4 Hz, 2H), 8.21 (dd,  $J$  = 8.2 Hz, 2H), 8.13 (d,  $J$  = 8.1 Hz, 1H), 8.04 (d,  $J$  = 8.0 Hz, 1H), 7.92 (dt,  $J$  = 8.1 Hz, 2H), 7.74 (tt,  $J$  = 7.3 Hz, 2H), 7.68 (tt,  $J$  = 7.4 Hz, 1H), 7.53 (m, 2H), 7.47 (dd,  $J$  = 5.3 Hz, 1H), 7.36 (dd,  $J$  = 8.2 Hz, 1H), 7.20 (m, 2H), 4.11 (t,  $J$  = 5.7 Hz, 2H), 3.37 (t,  $J$  = 7.4 Hz, 2H), 3.04 (t,  $J$  = 6.2 Hz, 2H), 2.46 (m, 2H), 2.32 (t,  $J$  = 5.7 Hz, 2H), 1.30 (m, 2H).  $^{13}\text{C}$  NMR (100 MHz,  $\text{CD}_3\text{CN}$ ):  $\delta$  (ppm) = 161.0, 159.4, 158.2, 154.4, 153.7, 152.9, 152.3, 147.7, 147.5, 146.2, 138.3, 138.1, 137.8, 136.3, 131.3, 131.1, 130.6, 128.7, 128.4, 1128.3, 128.0, 127.0, 125.5, 124.9, 122.3, 49.8, 49.5, 49.2, 47.7, 24.2, 23.1. Calc. for  $\text{C}_{40}\text{H}_{34}\text{N}_8\text{RuP}_2\text{F}_{12}\cdot (\text{C}_2\text{H}_5)_2\text{O}$ : C, 48.40%; H, 4.06%; N, 10.26%. Found: C, 47.97%; H, 3.92%; N, 10.20%. HRMS (ESI):  $m/z$   $[\text{M}-\text{PF}_6]^+$  calcd for  $\text{C}_{40}\text{H}_{34}\text{N}_8\text{RuPF}_6$ : 873.15968; found: 873.16233; difference: 3.03 ppm.

#### ***mer*-[Ru(QpyG)(phtpy)][(PF<sub>6</sub>)<sub>3</sub>] (9)**

Synthesized from ligand 3 by following the procedure described above for metal complex 7. (14.5 mg, 10%).

$^1\text{H}$  NMR (400 MHz,  $\text{CD}_3\text{CN}$ ):  $\delta$  (ppm) = 8.70-6.0 (m, broad), 8.55-8.47 (m, broad), 8.43 (d, broad), 8.30-8.19 (m, broad), 8.16-8.04 (m, broad), 8.01 (d, broad), 7.96-7.90 (m, broad), 7.88-7.83 (m, broad), 7.77 (d, broad), 7.72-7.66 (m, broad), 7.65-7.57 (m, broad), 3.27-3.14 (m, broad), 2.91-2.83 (m, broad), 2.41-2.25 (m, broad), 1.82-1.72 (m, broad), 1.33-1.25 (m, broad), 1.20-1.10 (m, broad).  $^{13}\text{C}$  NMR (100 MHz,  $\text{CD}_3\text{CN}$ ):  $\delta$  (ppm) = No peak was observed due to the paramagnetic nature of the compound. HRMS (ESI):  $m/z$   $[\text{M}-\text{PF}_6]^+$  calcd for  $\text{C}_{42}\text{H}_{36}\text{N}_8\text{RuPF}_6$ : 899.17538; found: 899.17326; difference: 2.36 ppm



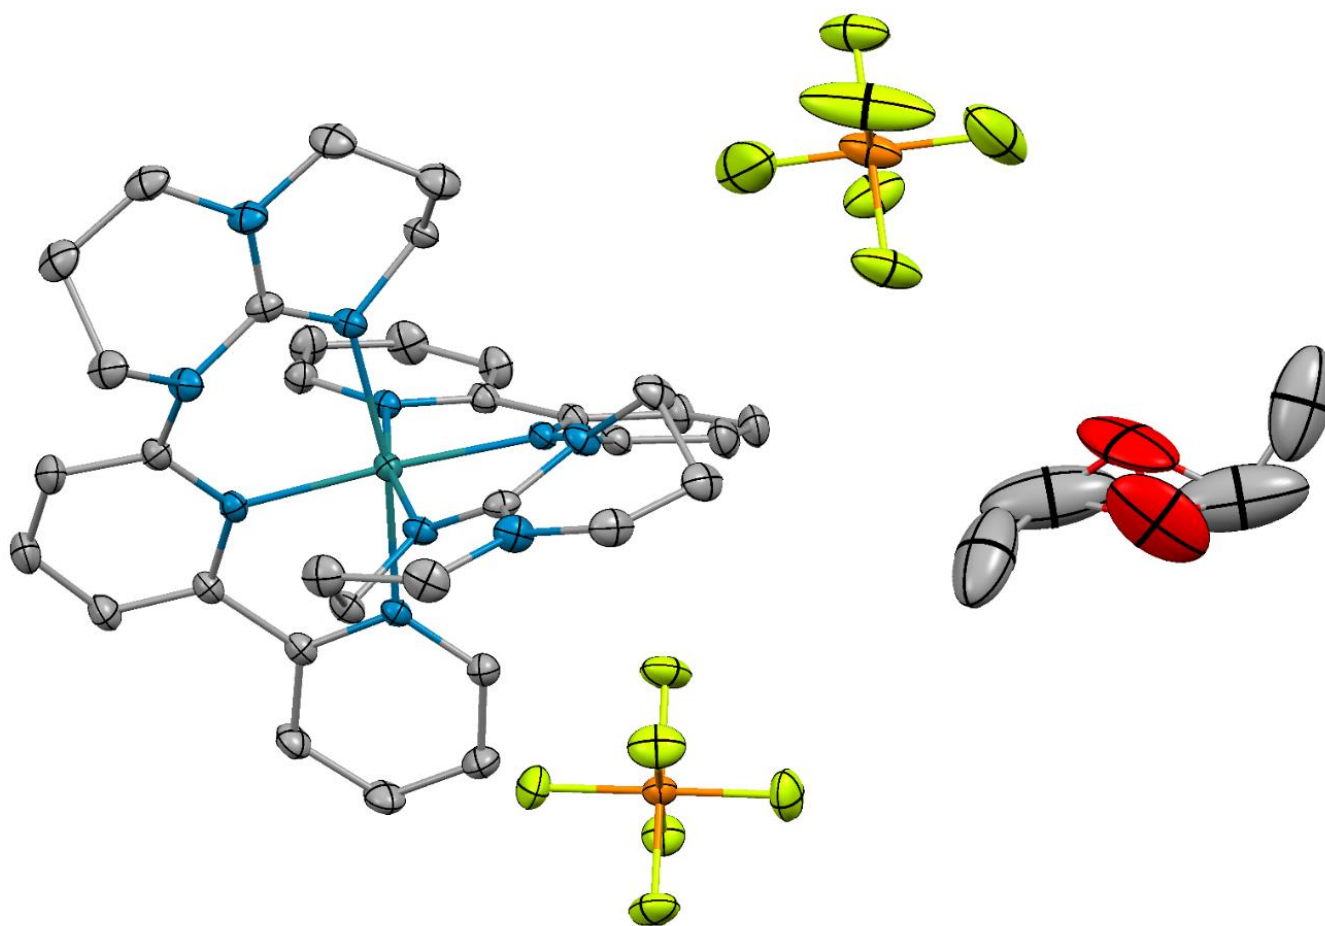

**Figure S1** – Thermal ellipsoid diagram (30% probability) of the single crystal of **4** with the counter-anions (PF<sub>6</sub>) and a disordered diethyl ether co-crystallization solvent molecule. The hydrogens atoms are omitted for clarity.

**Table 2** – Atomic coordinates for DFT optimization of **4**<sup>2+</sup> in (*S* = 0) PBE0/LANL2DZ, CPCM(CH<sub>3</sub>CN).

| Center Number | Atomic Number | Atomic Type | Standard orientation    |           |           |
|---------------|---------------|-------------|-------------------------|-----------|-----------|
|               |               |             | Coordinates (Angstroms) |           |           |
|               |               |             | X                       | Y         | Z         |
| 1             | 44            | 0           | -0.000219               | 0.479713  | 0.000006  |
| 2             | 7             | 0           | 1.824154                | 0.623289  | 0.881213  |
| 3             | 7             | 0           | -0.370106               | 1.980844  | 1.368745  |
| 4             | 7             | 0           | 0.732269                | -0.946179 | -1.330792 |
| 5             | 7             | 0           | 2.202619                | -2.710516 | -1.909561 |
| 6             | 7             | 0           | 2.622483                | -1.465294 | 0.031346  |
| 7             | 6             | 0           | 1.999801                | 1.734069  | 1.674596  |
| 8             | 6             | 0           | 2.855581                | -0.235586 | 0.671366  |
| 9             | 6             | 0           | 0.763061                | 2.475503  | 1.966180  |
| 10            | 6             | 0           | -1.566647               | 2.552917  | 1.647821  |
| 11            | 1             | 0           | -2.434813               | 2.121020  | 1.167853  |
| 12            | 6             | 0           | 1.808133                | -1.674940 | -1.096102 |
| 13            | 6             | 0           | 3.248772                | 2.061351  | 2.203444  |
| 14            | 1             | 0           | 3.381175                | 2.940160  | 2.820592  |
| 15            | 6             | 0           | 3.555970                | -3.305096 | -1.955585 |

|    |   |   |           |           |           |
|----|---|---|-----------|-----------|-----------|
| 16 | 1 | 0 | 4.028198  | -3.039252 | -2.910380 |
| 17 | 1 | 0 | 3.420044  | -4.393939 | -1.950455 |
| 18 | 6 | 0 | -1.689282 | 3.643334  | 2.510613  |
| 19 | 1 | 0 | -2.667983 | 4.066763  | 2.703077  |
| 20 | 6 | 0 | 0.090745  | -1.166319 | -2.643524 |
| 21 | 1 | 0 | 0.710671  | -0.728541 | -3.440544 |
| 22 | 1 | 0 | -0.868072 | -0.653469 | -2.652103 |
| 23 | 6 | 0 | -0.534752 | 4.168995  | 3.108832  |
| 24 | 1 | 0 | -0.595120 | 5.019389  | 3.778617  |
| 25 | 6 | 0 | 0.700533  | 3.573166  | 2.835155  |
| 26 | 1 | 0 | 1.599045  | 3.957228  | 3.301747  |
| 27 | 6 | 0 | 1.301793  | -3.296669 | -2.923002 |
| 28 | 1 | 0 | 1.247031  | -4.379027 | -2.748427 |
| 29 | 1 | 0 | 1.758323  | -3.146425 | -3.910710 |
| 30 | 6 | 0 | 3.490233  | -2.610703 | 0.393615  |
| 31 | 1 | 0 | 2.847993  | -3.479191 | 0.581858  |
| 32 | 1 | 0 | 4.011831  | -2.388504 | 1.323466  |
| 33 | 6 | 0 | 4.430302  | -2.894267 | -0.770761 |
| 34 | 1 | 0 | 5.018274  | -1.999214 | -1.000381 |
| 35 | 1 | 0 | 5.129725  | -3.700083 | -0.530339 |
| 36 | 6 | 0 | 4.143861  | 0.076520  | 1.155301  |
| 37 | 1 | 0 | 4.986336  | -0.561335 | 0.923594  |
| 38 | 6 | 0 | -0.082809 | -2.664326 | -2.884267 |
| 39 | 1 | 0 | -0.686609 | -3.090466 | -2.075204 |
| 40 | 1 | 0 | -0.600744 | -2.858007 | -3.828805 |
| 41 | 6 | 0 | 4.338198  | 1.231160  | 1.912020  |
| 42 | 1 | 0 | 5.329263  | 1.479792  | 2.274371  |
| 43 | 7 | 0 | -1.824717 | 0.621765  | -0.881189 |
| 44 | 7 | 0 | 0.368411  | 1.981126  | -1.368770 |
| 45 | 7 | 0 | -0.731519 | -0.946756 | 1.330818  |
| 46 | 7 | 0 | -2.200255 | -2.712447 | 1.909516  |
| 47 | 7 | 0 | -2.621271 | -1.467504 | -0.031331 |
| 48 | 6 | 0 | -2.001300 | 1.732405  | -1.674557 |
| 49 | 6 | 0 | -2.855426 | -0.237967 | -0.671316 |
| 50 | 6 | 0 | -0.765174 | 2.474848  | -1.966186 |
| 51 | 6 | 0 | 1.564475  | 2.554174  | -1.647882 |
| 52 | 1 | 0 | 2.433008  | 2.122999  | -1.167928 |
| 53 | 6 | 0 | -1.806725 | -1.676477 | 1.096097  |
| 54 | 6 | 0 | -3.250557 | 2.058679  | -2.203348 |
| 55 | 1 | 0 | -3.383699 | 2.937380  | -2.820491 |
| 56 | 6 | 0 | -3.553043 | -3.308305 | 1.955500  |
| 57 | 1 | 0 | -4.025495 | -3.043038 | 2.910345  |
| 58 | 1 | 0 | -3.416101 | -4.397021 | 1.950209  |
| 59 | 6 | 0 | 1.686197  | 3.644677  | -2.510697 |
| 60 | 1 | 0 | 2.664547  | 4.068904  | -2.703189 |

|    |   |   |           |           |           |
|----|---|---|-----------|-----------|-----------|
| 61 | 6 | 0 | -0.089836 | -1.166348 | 2.643562  |
| 62 | 1 | 0 | -0.710217 | -0.729210 | 3.440579  |
| 63 | 1 | 0 | 0.868488  | -0.652577 | 2.652208  |
| 64 | 6 | 0 | 0.531223  | 4.169381  | -3.108899 |
| 65 | 1 | 0 | 0.590879  | 5.019810  | -3.778703 |
| 66 | 6 | 0 | -0.703567 | 3.572545  | -2.835180 |
| 67 | 1 | 0 | -1.602405 | 3.955858  | -3.301762 |
| 68 | 6 | 0 | -1.298852 | -3.297883 | 2.922863  |
| 69 | 1 | 0 | -1.243041 | -4.380160 | 2.748121  |
| 70 | 1 | 0 | -1.755530 | -3.148230 | 3.910592  |
| 71 | 6 | 0 | -3.487996 | -2.613684 | -0.393631 |
| 72 | 1 | 0 | -2.844978 | -3.481590 | -0.581908 |
| 73 | 1 | 0 | -4.009805 | -2.391941 | -1.323469 |
| 74 | 6 | 0 | -4.427782 | -2.898136 | 0.770756  |
| 75 | 1 | 0 | -5.016511 | -2.003602 | 1.000464  |
| 76 | 1 | 0 | -5.126521 | -3.704537 | 0.530309  |
| 77 | 6 | 0 | -4.143992 | 0.073133  | -1.155147 |
| 78 | 1 | 0 | -4.985955 | -0.565367 | -0.923357 |
| 79 | 6 | 0 | 0.085147  | -2.664201 | 2.884225  |
| 80 | 1 | 0 | 0.689391  | -3.089708 | 2.075163  |
| 81 | 1 | 0 | 0.603226  | -2.857447 | 3.828774  |
| 82 | 6 | 0 | -4.339301 | 1.227623  | -1.911846 |
| 83 | 1 | 0 | -5.330589 | 1.475476  | -2.274119 |

**Table 3** - Selected bond distances and angles of **4**

| Bond Length       |              |             | Angle      |              |             |
|-------------------|--------------|-------------|------------|--------------|-------------|
|                   | Obs. (X-ray) | Calc. (DFT) |            | Obs. (X-ray) | Calc. (DFT) |
| N1-Ru1<br>N1'-Ru1 | 2.0542 (17)  | 2.06487     | N1-Ru1-N1' | 86.59 (9)    | 86.720      |
|                   |              |             | N1-Ru1-N2  | 79.63 (7)    | 79.742      |
|                   |              |             | N1-Ru1-N2' | 94.03 (7)    | 94.350      |
|                   |              |             | N1-Ru1-N4  | 169.27 (7)   | 169.715     |
| N2-Ru1<br>N2'-Ru1 | 2.0165 (18)  | 2.03113     | N1-Ru1-N4' | 91.98 (7)    | 90.656      |
|                   |              |             | N2-Ru1-N1' | 94.03 (7)    | 94.349      |
|                   |              |             | N2-Ru1-N2' | 171.35 (10)  | 171.936     |
|                   |              |             | N2-Ru1-N4  | 89.88 (7)    | 90.556      |
| N4-Ru1<br>N4'-Ru1 | 2.0621 (18)  | 2.08343     | N2-Ru1-N4' | 96.16 (7)    | 94.965      |
|                   |              |             | N4-Ru1-N1' | 91.98 (7)    | 90.656      |
|                   |              |             | N4-Ru1-N2' | 96.17 (7)    | 94.965      |
|                   |              |             | N4-Ru1-N4' | 91.36 (10)   | 93.602      |

**Table 4.** Total energy values for the optimized structure of the first and second oxidation on complex **4** (uPBE1PBE, LANL2DZ, CPCM: Acetonitrile).

| 4             | S   | 2S+1 | Total Energy   |                 |      | Experimental |
|---------------|-----|------|----------------|-----------------|------|--------------|
|               |     |      | a. u.          | eV              | ΔeV  | eV           |
| Neutral       | 0   | 1    | -1957.34027912 | -53261.96169984 | -    | -            |
| 1st oxidation | 1/2 | 2    | -1957.17249935 | -53257.39617805 | 4.57 | 4.68         |
| 2nd oxidation | 1   | 3    | -1956.92448050 | -53250.67723888 | 6.72 | 5.87         |

**Table 5.** Spin contamination monitoring for the DFT calculation of 4 oxidized species.

| 4             | S   | 2S+1 | S**2                |                    |          |
|---------------|-----|------|---------------------|--------------------|----------|
|               |     |      | Before annihilation | After annihilation | % change |
| 1st oxidation | 1/2 | 2    | 0.7549              | 0.7500             | 1        |
| 2nd oxidation | 1   | 3    | 2.0162              | 2.0002             | 1        |

**Table 6.** Mulliken spin density values for each of the oxidized 4 species.

| 4             | Mulliken spin density |             |             |
|---------------|-----------------------|-------------|-------------|
|               | Ruthenium             | 2,2'-bpy    | hpp         |
| 1st oxidation | 0.782 (78%)           | -0.008 (0%) | 0.228 (23%) |
| 2nd oxidation | 0.764 (38%)           | 0.013 (1%)  | 1.318 (66%) |

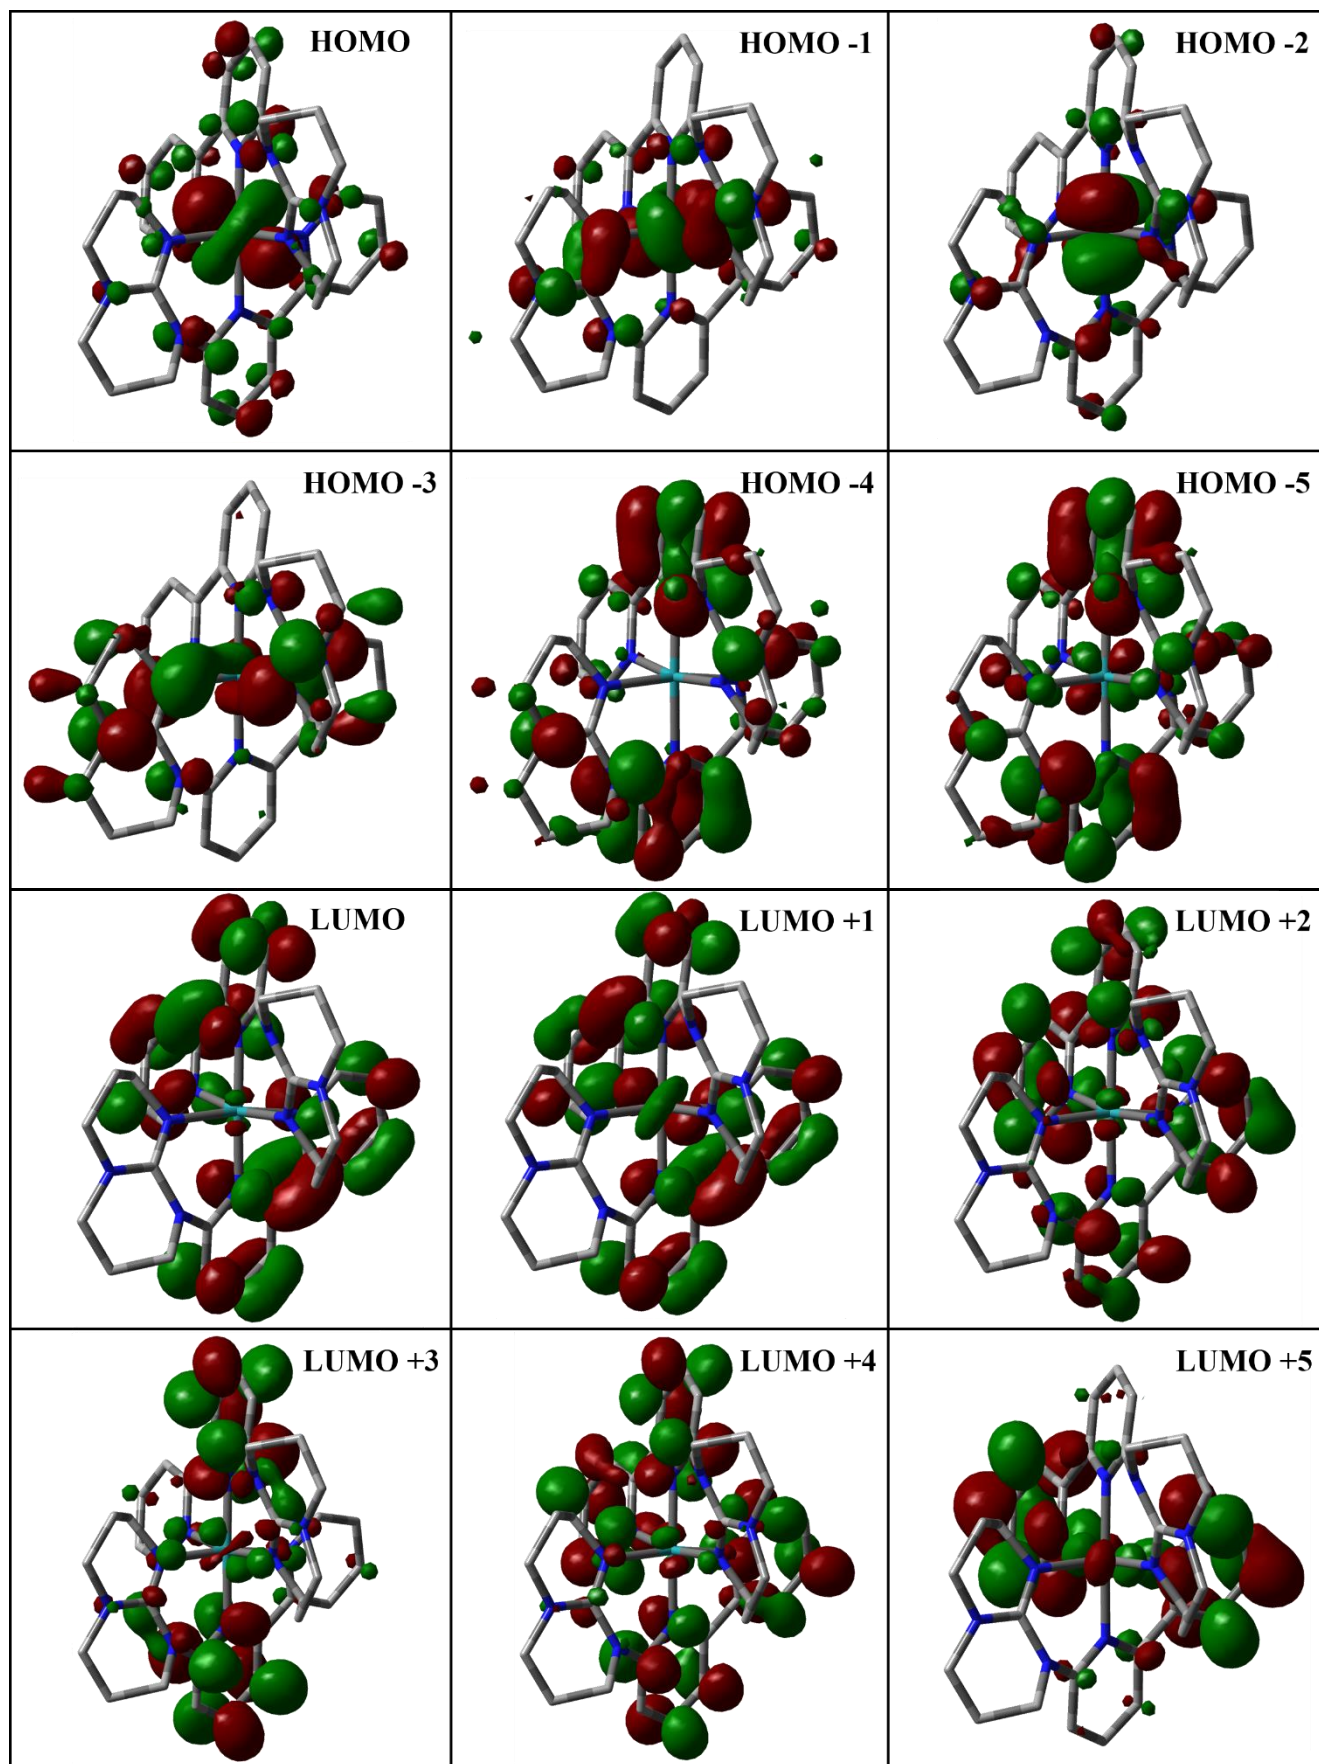

Figure S2 - Kohn-Sham electron density illustration of the the molecular orbitals for  $4^{2+}$  in ( $S = 0$ ) ground state.

**Table S7.** MO composition of 4<sup>2+</sup> in (S=0) ground state.

| MO          | Energy (eV)   | Composition |                |          |
|-------------|---------------|-------------|----------------|----------|
|             |               | Ruthenium   | bpyG           |          |
|             |               |             | 2,2'-bipyridyl | hpp      |
| LUMO+5      | -0.125        | 1           | 92             | 6        |
| LUMO+4      | -1.348        | 5           | 94             | 1        |
| LUMO+3      | -1.389        | 2           | 88             | 9        |
| LUMO+2      | -1.551        | 2           | 94             | 4        |
| LUMO+1      | -2.295        | 9           | 90             | 1        |
| <b>LUMO</b> | <b>-2.589</b> | <b>1</b>    | <b>98</b>      | <b>1</b> |
| <b>HOMO</b> | <b>-5.259</b> | <b>59</b>   | <b>29</b>      | <b>9</b> |
| HOMO-1      | -6.073        | 69          | 24             | 7        |
| HOMO-2      | -6.173        | 78          | 12             | 9        |
| HOMO-3      | -6.752        | 4           | 6              | 79       |
| HOMO-4      | -7.126        | 0           | 51             | 44       |
| HOMO-5      | -7.175        | 5           | 54             | 37       |

**Table S8** - Selected transitions from TD-DFT calculations of 4<sup>2+</sup> in the singlet ground state (PBE0), CPCM (CH<sub>3</sub>CN).

| Energy (eV) | $\lambda$ (nm) | f      | Transition                                                     | Character              |
|-------------|----------------|--------|----------------------------------------------------------------|------------------------|
| 1.69        | 735            | 0.0064 | H→L (99%)                                                      | hpp to bpy ; Ru to bpy |
| 1.84        | 674            | 0.0070 | H→L+1 (97%)                                                    | hpp to bpy ; Ru to bpy |
| 2.53        | 491            | 0.0671 | H-2→L+1 (17%)<br>H-1→L (79%)                                   | Ru to bpy              |
| 2.66        | 466            | 0.0617 | H-2→L+1 (77%)<br>H-1→L (16%)                                   | Ru to bpy              |
| 2.97        | 418            | 0.0456 | H→L+4 (87%)                                                    | hpp to bpy ; Ru to bpy |
| 3.17        | 391            | 0.0891 | H-1→L+1 (30%)<br>H→L+5 (52%)                                   | hpp to bpy ; Ru to bpy |
| 3.88        | 320            | 0.1271 | H-4→L (68%)<br>H-1→L+5 (17%)                                   | hpp to bpy ; Ru to bpy |
| 3.93        | 316            | 0.2899 | H-5→L (70%)<br>H-1→L+4 (15%)                                   | hpp to bpy ; Ru to bpy |
| 4.76        | 261            | 0.1792 | H-7→L (55%)<br>H-4→L+2 (22%)                                   | hpp to bpy             |
| 4.84        | 256            | 0.1748 | H-8→L (11%)<br>H-2→L+13 (11%)<br>H-1→L+10 (14%)<br>H→L+8 (33%) | Ru to bpy              |
| 4.91        | 252            | 0.1307 | H-8→L (57%)<br>H-5→L+2 (15%)                                   | hpp to bpy ; Ru to bpy |
| 5.05        | 246            | 0.1337 | H-7→L+1 (81%)                                                  | hpp to bpy             |
| 5.21        | 238            | 0.1147 | H-6→L+2 (67%)                                                  | hpp to bpy ; Ru to bpy |
| 5.76        | 215            | 0.1089 | H-12→L (23%)<br>H-10→L+1 (16%)<br>H-7→L+2 (31%)                | hpp to bpy             |

**Table S9** – Atomic coordinates for DFT optimization of  $5^{2+}$  in (S = 0) PBE0/LANL2DZ, CPCM(CH<sub>3</sub>CN).

| Standard orientation |               |             |                         |           |           |  |
|----------------------|---------------|-------------|-------------------------|-----------|-----------|--|
| Center Number        | Atomic Number | Atomic Type | Coordinates (Angstroms) |           |           |  |
|                      |               |             | X                       | Y         | Z         |  |
| 1                    | 6             | 0           | 4.191292                | -1.082350 | 0.240532  |  |
| 2                    | 6             | 0           | 4.804589                | -0.032138 | -0.418386 |  |
| 3                    | 7             | 0           | 2.015209                | -0.204226 | -0.245035 |  |
| 4                    | 6             | 0           | 4.018412                | 0.946975  | -1.074387 |  |
| 5                    | 6             | 0           | 2.768678                | -1.178829 | 0.306427  |  |
| 6                    | 6             | 0           | 2.621094                | 0.814674  | -0.952485 |  |
| 7                    | 6             | 0           | 4.554143                | 2.031224  | -1.850277 |  |
| 8                    | 6             | 0           | 3.722542                | 2.906120  | -2.504708 |  |
| 9                    | 6             | 0           | 2.293287                | 2.758382  | -2.433076 |  |
| 10                   | 6             | 0           | 1.383366                | 3.592520  | -3.129534 |  |
| 11                   | 6             | 0           | 1.753766                | 1.717125  | -1.638711 |  |
| 12                   | 6             | 0           | 0.019054                | 3.346784  | -3.018575 |  |
| 13                   | 6             | 0           | -0.441392               | 2.288469  | -2.209091 |  |
| 14                   | 7             | 0           | 0.397909                | 1.492271  | -1.522812 |  |
| 15                   | 7             | 0           | 2.173594                | -2.323440 | 0.884214  |  |
| 16                   | 6             | 0           | 2.370252                | -4.788521 | 1.355119  |  |
| 17                   | 7             | 0           | 0.696402                | -3.402798 | 2.395472  |  |
| 18                   | 6             | 0           | 1.741568                | -4.395031 | 2.682630  |  |
| 19                   | 6             | 0           | 0.915968                | -2.360064 | 1.529936  |  |
| 20                   | 6             | 0           | 3.046686                | -3.540781 | 0.817460  |  |
| 21                   | 7             | 0           | 0.000000                | -1.418016 | 1.356200  |  |
| 22                   | 6             | 0           | -1.733222               | -2.830319 | 2.363815  |  |
| 23                   | 6             | 0           | -0.660498               | -3.799129 | 2.846000  |  |
| 24                   | 6             | 0           | -1.108007               | -1.438450 | 2.330228  |  |
| 25                   | 44            | 0           | 0.000000                | 0.000000  | -0.159238 |  |
| 26                   | 6             | 0           | -4.191292               | 1.082350  | 0.240532  |  |
| 27                   | 6             | 0           | -4.804589               | 0.032138  | -0.418386 |  |
| 28                   | 7             | 0           | -2.015209               | 0.204226  | -0.245035 |  |
| 29                   | 6             | 0           | -4.018412               | -0.946975 | -1.074387 |  |
| 30                   | 6             | 0           | -2.768678               | 1.178829  | 0.306427  |  |
| 31                   | 6             | 0           | -2.621094               | -0.814674 | -0.952485 |  |
| 32                   | 6             | 0           | -4.554143               | -2.031224 | -1.850277 |  |
| 33                   | 6             | 0           | -3.722542               | -2.906120 | -2.504708 |  |
| 34                   | 6             | 0           | -2.293287               | -2.758382 | -2.433076 |  |
| 35                   | 6             | 0           | -1.383366               | -3.592520 | -3.129534 |  |
| 36                   | 6             | 0           | -1.753766               | -1.717125 | -1.638711 |  |
| 37                   | 6             | 0           | -0.019054               | -3.346784 | -3.018575 |  |
| 38                   | 6             | 0           | 0.441392                | -2.288469 | -2.209091 |  |
| 39                   | 7             | 0           | -0.397909               | -1.492271 | -1.522812 |  |
| 40                   | 7             | 0           | -2.173594               | 2.323440  | 0.884214  |  |
| 41                   | 6             | 0           | -2.370252               | 4.788521  | 1.355119  |  |

|    |   |   |           |           |           |
|----|---|---|-----------|-----------|-----------|
| 42 | 7 | 0 | -0.696402 | 3.402798  | 2.395472  |
| 43 | 6 | 0 | -1.741568 | 4.395031  | 2.682630  |
| 44 | 6 | 0 | -0.915968 | 2.360064  | 1.529936  |
| 45 | 6 | 0 | -3.046686 | 3.540781  | 0.817460  |
| 46 | 7 | 0 | 0.000000  | 1.418016  | 1.356200  |
| 47 | 6 | 0 | 1.733222  | 2.830319  | 2.363815  |
| 48 | 6 | 0 | 0.660498  | 3.799129  | 2.846000  |
| 49 | 6 | 0 | 1.108007  | 1.438450  | 2.330228  |
| 50 | 1 | 0 | -1.598682 | 5.166934  | 0.675873  |
| 51 | 1 | 0 | -3.128707 | 5.567051  | 1.479149  |
| 52 | 1 | 0 | -4.812243 | 1.820563  | 0.725370  |
| 53 | 1 | 0 | -3.364484 | 3.669858  | -0.221796 |
| 54 | 1 | 0 | -5.887444 | -0.033048 | -0.441543 |
| 55 | 1 | 0 | -5.632456 | -2.137898 | -1.919756 |
| 56 | 1 | 0 | -4.131709 | -3.717504 | -3.098862 |
| 57 | 1 | 0 | -1.755436 | -4.404517 | -3.746056 |
| 58 | 1 | 0 | 0.704963  | -3.957838 | -3.544710 |
| 59 | 1 | 0 | 1.499312  | -2.079442 | -2.116493 |
| 60 | 1 | 0 | -3.935633 | 3.372322  | 1.432446  |
| 61 | 1 | 0 | -2.495053 | 3.983333  | 3.366214  |
| 62 | 1 | 0 | -1.270568 | 5.244623  | 3.180060  |
| 63 | 1 | 0 | 0.860385  | 4.815741  | 2.483539  |
| 64 | 1 | 0 | 0.642489  | 3.835170  | 3.941620  |
| 65 | 1 | 0 | 2.594654  | 2.867904  | 3.037848  |
| 66 | 1 | 0 | 2.080134  | 3.093068  | 1.358431  |
| 67 | 1 | 0 | 0.726495  | 1.179899  | 3.329943  |
| 68 | 1 | 0 | 1.830667  | 0.677071  | 2.048188  |
| 69 | 1 | 0 | -1.830667 | -0.677071 | 2.048188  |
| 70 | 1 | 0 | -0.726495 | -1.179899 | 3.329943  |
| 71 | 1 | 0 | -2.594654 | -2.867904 | 3.037848  |
| 72 | 1 | 0 | -2.080134 | -3.093068 | 1.358431  |
| 73 | 1 | 0 | -0.860385 | -4.815741 | 2.483539  |
| 74 | 1 | 0 | -0.642489 | -3.835170 | 3.941620  |
| 75 | 1 | 0 | 1.270568  | -5.244623 | 3.180060  |
| 76 | 1 | 0 | 2.495053  | -3.983333 | 3.366214  |
| 77 | 1 | 0 | 1.598682  | -5.166934 | 0.675873  |
| 78 | 1 | 0 | 3.128707  | -5.567051 | 1.479149  |
| 79 | 1 | 0 | 3.935633  | -3.372322 | 1.432446  |
| 80 | 1 | 0 | 3.364484  | -3.669858 | -0.221796 |
| 81 | 1 | 0 | 4.812243  | -1.820563 | 0.725370  |
| 82 | 1 | 0 | 5.887444  | 0.033048  | -0.441543 |
| 83 | 1 | 0 | 5.632456  | 2.137898  | -1.919756 |
| 84 | 1 | 0 | 4.131709  | 3.717504  | -3.098862 |
| 85 | 1 | 0 | 1.755436  | 4.404517  | -3.746056 |
| 86 | 1 | 0 | -0.704963 | 3.957838  | -3.544710 |



**Table S10.** Total energy values for the optimized structure of the first and second oxidation on complex **5** (uPBE1PBE, LANL2DZ, CPCM: Acetonitrile).

| 5             | S   | 2S+1 | Total Energy   |                  |             | Experimental |
|---------------|-----|------|----------------|------------------|-------------|--------------|
|               |     |      | a. u.          | eV               | $\Delta eV$ | eV           |
| Neutral       | 0   | 1    | -2109.61215483 | -57405.498080329 | -           | -            |
| 1st oxidation | 1/2 | 2    | -2109.42863809 | -57400.504333094 | 4.99        | 4.68         |
| 2nd oxidation | 1   | 3    | -2109.20775581 | -57394.493817241 | 6.01        | 5.80         |

**TableS11.** Spin contamination monitoring for the DFT calculation of **5** oxidized species.

| 5             | S   | 2S+1 | S**2                |                    |          |
|---------------|-----|------|---------------------|--------------------|----------|
|               |     |      | Before annihilation | After annihilation | % change |
| 1st oxidation | 1/2 | 2    | 0.7576              | 0.7500             | 1        |
| 2nd oxidation | 1   | 3    | 2.0157              | 2.0001             | 1        |

**Table S12.** Mulliken spin density values for each of the oxidized **5** species.

| 5             | Mulliken spin density |                     |             |
|---------------|-----------------------|---------------------|-------------|
|               | Ruthenium             | 1,10-phenanthroline | hpp         |
| 1st oxidation | 0.879 (88%)           | -0.004 (0%)         | 0.126 (13%) |
| 2nd oxidation | 0.979 (49%)           | 0.015 (1%)          | 1.006 (50%) |

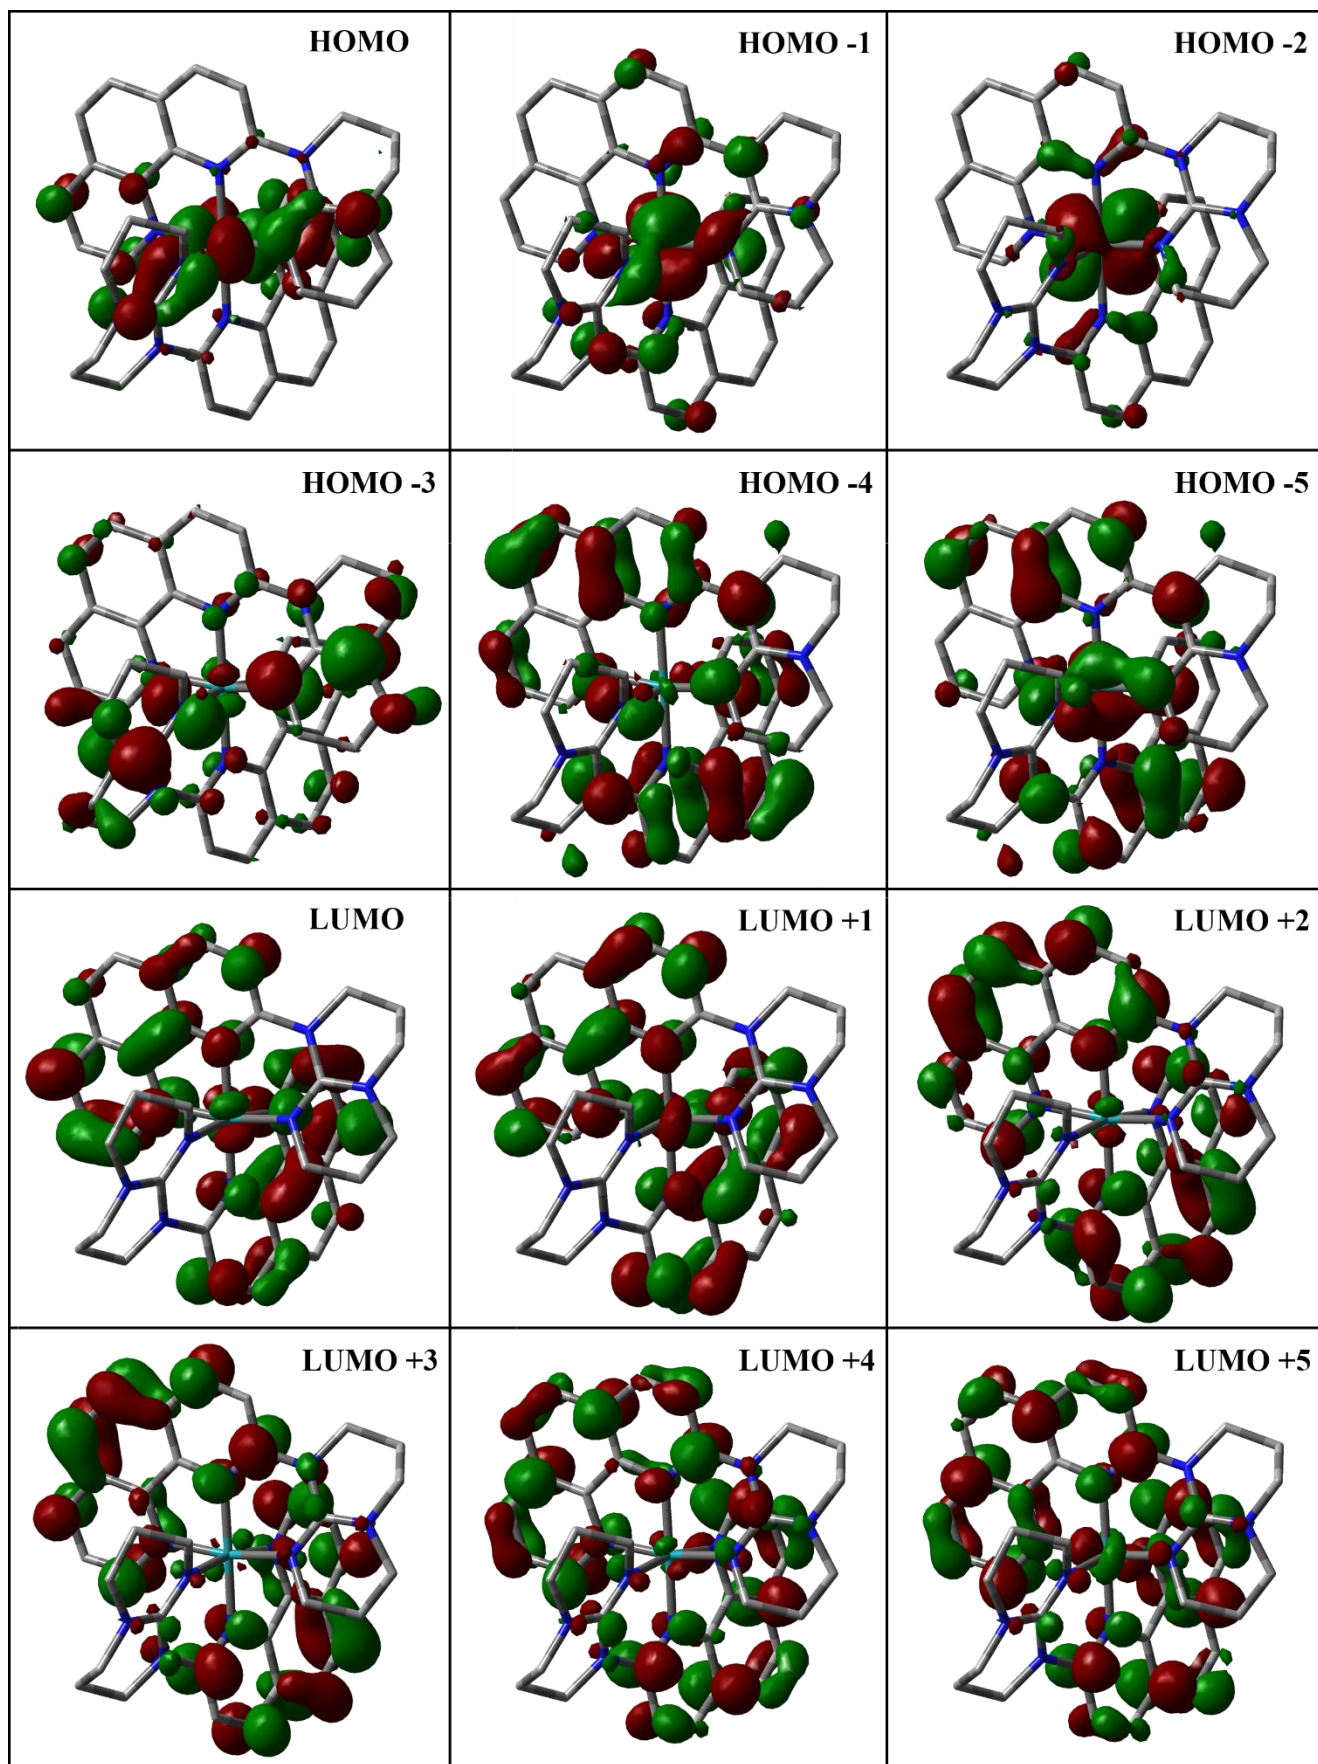

Figure S3 - Kohn-Sham electron density illustration of the the molecular orbitals for  $5^{2+}$  in ( $S = 0$ ) ground state

**Table S13.** MO composition of 5<sup>2+</sup> in (S=0) ground state.

| MO          | Energy (eV)   | Composition |                     |           |
|-------------|---------------|-------------|---------------------|-----------|
|             |               | Ruthenium   | phenG               |           |
|             |               |             | 1,10-phenanthroline | hpp       |
| LUMO+5      | -0.848        | 4           | 83                  | 13        |
| LUMO+4      | -0.923        | 4           | 81                  | 15        |
| LUMO+3      | -2.185        | 2           | 97                  | 1         |
| LUMO+2      | -2.206        | 2           | 95                  | 3         |
| LUMO+1      | -2.302        | 4           | 92                  | 4         |
| <b>LUMO</b> | <b>-2.322</b> | <b>2</b>    | <b>92</b>           | <b>6</b>  |
| <b>HOMO</b> | <b>-5.362</b> | <b>58</b>   | <b>8</b>            | <b>33</b> |
| HOMO-1      | -5.443        | 63          | 14                  | 23        |
| HOMO-2      | -6.021        | 86          | 9                   | 6         |
| HOMO-3      | -6.706        | 8           | 9                   | 83        |
| HOMO-4      | -6.948        | 7           | 55                  | 38        |
| HOMO-5      | -7.078        | 9           | 57                  | 34        |

**Table S14 -** Selected transitions from TD-DFT calculations of 5<sup>2+</sup> in the singlet ground state (PBE0), CPCM (CH<sub>3</sub>CN).

| Energy (eV) | $\lambda$ (nm) | f      | Transition                                                           | Character               |
|-------------|----------------|--------|----------------------------------------------------------------------|-------------------------|
| 2,32        | 533            | 0,1311 | H-1→L+1 (74%)<br>HOMO→LUMO (21%)                                     | Ru to phen; hpp to phen |
| 4,01        | 309            | 0,0942 | H-4→L+3 (11%)<br>H-3→LUMO (10%)<br>H-3→L+2 (69%)                     | hpp to phen             |
| 4,04        | 307            | 0,2253 | H-4→L+2 (29%)<br>H-3→L+3 (49%)                                       | hpp to phen             |
| 4,37        | 283            | 0,0863 | HOMO→L+7 (75%)                                                       | Ru to phen; hpp to phen |
| 4,47        | 278            | 0,0907 | H-1→L+6 (60%)<br>HOMO→L+7 (11%)                                      | Ru to phen; hpp to phen |
| 4,55        | 273            | 0,2552 | H-8→L+1 (13%)<br>H-7→LUMO (49%)                                      | hpp to phen             |
| 4,59        | 270            | 0,1672 | H-1→L+7 (37%)<br>HOMO→L+6 (20%)                                      | Ru to phen; hpp to phen |
| 4,74        | 262            | 0,2009 | H-8→L+1 (14%)<br>H-8→L+3 (12%)<br>H-7→L+2 (39%)                      | Ru to phen; hpp to phen |
| 5,02        | 247            | 0,1802 | H-1→L+8 (16%)<br>HOMO→L+9 (38%)<br>HOMO→L+10 (14%)                   | Ru to phen; Ru to hpp   |
| 5,16        | 240            | 0,1464 | H-9→L+1 (56%)<br>H-4→L+4 (13%)                                       | hpp to phen             |
| 5,31        | 233            | 0,1793 | H-10→LUMO (27%)<br>H-9→L+1 (27%)<br>H-9→L+3 (13%)<br>H-3→L+5 (13%)   | hpp to phen             |
| 5,38        | 230            | 0,1556 | H-10→LUMO (10%)<br>H-9→L+3 (68%)                                     | hpp to phen             |
| 5,44        | 228            | 0,4247 | H-10→LUMO (29%)<br>H-4→L+4 (47%)                                     | hpp to phen             |
| 5,55        | 224            | 0,1228 | H-10→L+2 (56%)<br>H-5→L+5 (17%)                                      | hpp to phen             |
| 5,58        | 222            | 0,0769 | H-12→LUMO (15%)<br>H-11→L+1 (35%)<br>H-5→L+5 (22%)                   | hpp to phen             |
| 5,60        | 222            | 0,1420 | H-12→LUMO (14%)<br>H-11→L+1 (12%)<br>H-2→L+9 (25%)<br>H-2→L+10 (11%) | Ru to phen; hpp to phen |
| 5,61        | 221            | 0,1716 | H-10→L+2 (26%)<br>H-6→L+4 (16%)<br>H-5→L+5 (16%)                     | Ru to phen; hpp to phen |
| 5,71        | 217            | 0,1114 | H-12→L (32%)<br>H-11→L+1 (35%)                                       | hpp to phen             |
| 593         | 209            | 0,0981 | H-1→L+13 (22%)<br>H-1→L+15 (60%)                                     | Ru to phen; hpp to phen |

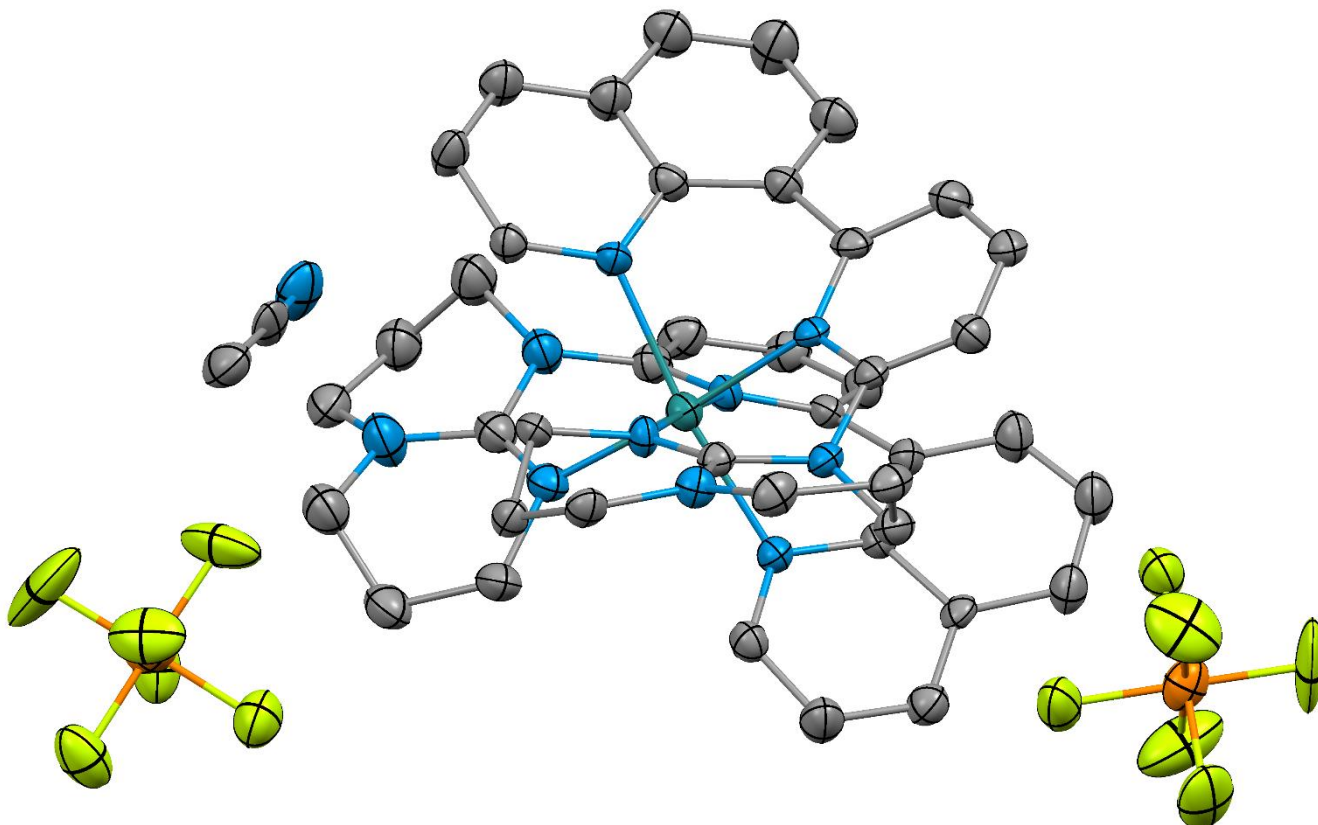

**Figure S4** – Thermal ellipsoid diagram (30% probability) of the single crystal of  $6^{2+}$  with the counter-anions ( $\text{PF}_6$ ) and an acetonitrile solvent molecule. The hydrogens atoms are omitted for clarity.

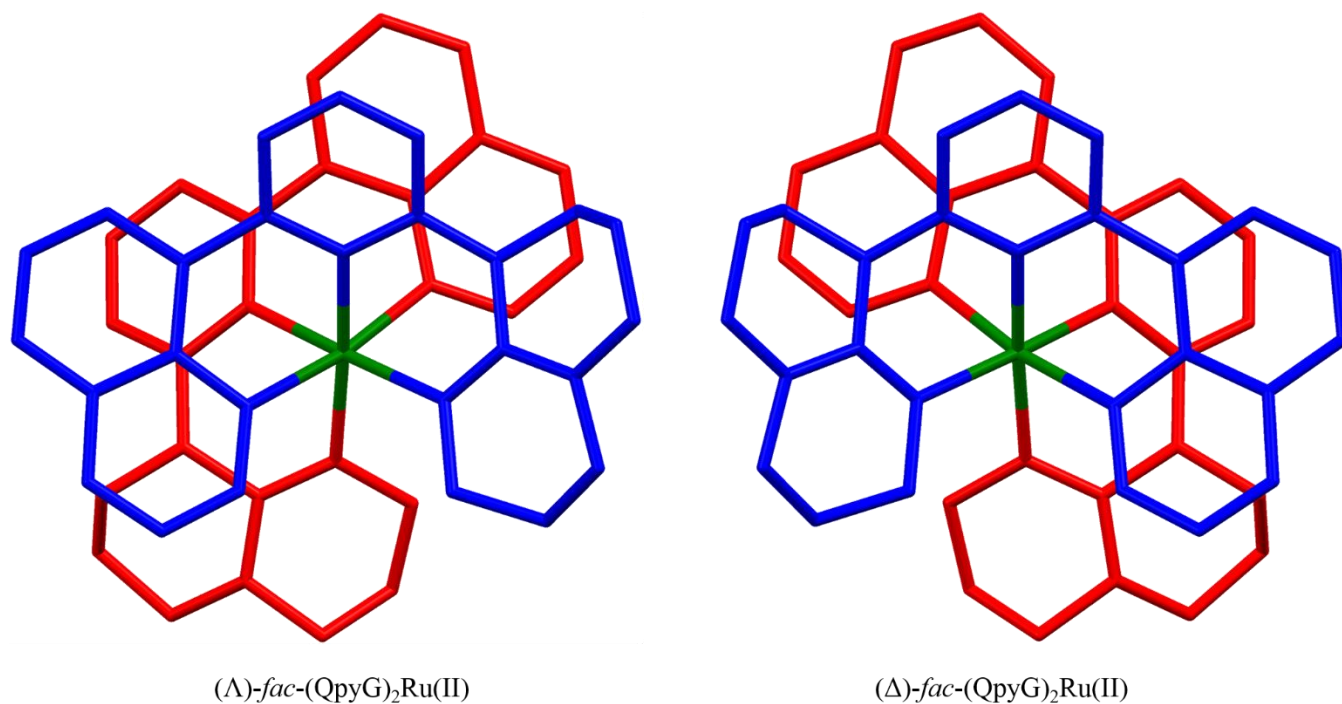

**Figure S5** – Capped stick view of both delta and lambda enantiomers found in the unit cell of metal complex  $6^{2+}$ . The hydrogens atoms, the counter-anions ( $\text{PF}_6$ ) and the solvent molecule (acetonitrile) are omitted for clarity.

**Table S15** – Atomic coordinates for DFT optimization of **6<sup>2+</sup>** in (S = 0) PBE0/LANL2DZ, CPCM(CH<sub>3</sub>CN).

| Standard orientation |               |             |                         |           |           |  |
|----------------------|---------------|-------------|-------------------------|-----------|-----------|--|
| Center Number        | Atomic Number | Atomic Type | Coordinates (Angstroms) |           |           |  |
|                      |               |             | X                       | Y         | Z         |  |
| 1                    | 6             | 0           | 0.426807                | 2.472986  | -3.443585 |  |
| 2                    | 6             | 0           | 0.103038                | 4.060480  | -1.169455 |  |
| 3                    | 6             | 0           | 0.705446                | 1.898296  | -2.200980 |  |
| 4                    | 6             | 0           | -0.009757               | 3.810972  | -3.579900 |  |
| 5                    | 6             | 0           | -0.098554               | 4.618467  | -2.462187 |  |
| 6                    | 6             | 0           | 0.389181                | 2.662016  | -1.025896 |  |
| 7                    | 6             | 0           | 1.531297                | 0.665515  | -2.161308 |  |
| 8                    | 6             | 0           | 3.394571                | -1.381815 | -2.000737 |  |
| 9                    | 6             | 0           | 2.429041                | 0.446574  | -3.219510 |  |
| 10                   | 7             | 0           | 1.513365                | -0.174220 | -1.074845 |  |
| 11                   | 6             | 0           | 2.482279                | -1.132636 | -0.960940 |  |
| 12                   | 6             | 0           | 3.339395                | -0.607987 | -3.155932 |  |
| 13                   | 7             | 0           | 2.568805                | -1.886208 | 0.223273  |  |
| 14                   | 6             | 0           | 4.629646                | -3.060381 | 0.811601  |  |
| 15                   | 6             | 0           | 4.445928                | -2.649908 | 2.273800  |  |
| 16                   | 6             | 0           | 3.235797                | -3.206099 | 0.206122  |  |
| 17                   | 6             | 0           | 2.447853                | -1.297260 | 1.489987  |  |
| 18                   | 7             | 0           | 3.217716                | -1.852653 | 2.475163  |  |
| 19                   | 7             | 0           | 1.578762                | -0.323490 | 1.709640  |  |
| 20                   | 6             | 0           | 1.766092                | 0.546328  | 2.895764  |  |
| 21                   | 6             | 0           | 2.857353                | 0.092808  | 3.872890  |  |
| 22                   | 6             | 0           | 2.925692                | -1.430938 | 3.851801  |  |
| 23                   | 1             | 0           | -0.344314               | 5.672713  | -2.547857 |  |
| 24                   | 1             | 0           | -0.217799               | 4.206233  | -4.568316 |  |
| 25                   | 1             | 0           | 0.573168                | 1.888921  | -4.345831 |  |
| 26                   | 1             | 0           | 2.457942                | 1.127352  | -4.058808 |  |
| 27                   | 1             | 0           | 4.040373                | -0.781125 | -3.964833 |  |
| 28                   | 1             | 0           | 4.164280                | -2.133325 | -1.894953 |  |
| 29                   | 1             | 0           | 3.245219                | -3.595370 | -0.811059 |  |
| 30                   | 1             | 0           | 2.638998                | -3.897309 | 0.809783  |  |
| 31                   | 1             | 0           | 4.352896                | -3.543298 | 2.902533  |  |
| 32                   | 1             | 0           | 5.310614                | -2.078305 | 2.634704  |  |
| 33                   | 1             | 0           | 5.183335                | -4.002363 | 0.760700  |  |
| 34                   | 1             | 0           | 5.201051                | -2.306959 | 0.258571  |  |
| 35                   | 1             | 0           | 3.714873                | -1.811111 | 4.503478  |  |
| 36                   | 1             | 0           | 1.973007                | -1.866923 | 4.181055  |  |
| 37                   | 1             | 0           | 2.632980                | 0.466581  | 4.876934  |  |
| 38                   | 1             | 0           | 3.835080                | 0.492029  | 3.579067  |  |
| 39                   | 1             | 0           | 0.805244                | 0.615422  | 3.415526  |  |
| 40                   | 1             | 0           | 2.014510                | 1.549929  | 2.536112  |  |
| 41                   | 6             | 0           | 0.000000                | 4.862933  | -0.000278 |  |

|    |    |   |           |           |           |
|----|----|---|-----------|-----------|-----------|
| 42 | 6  | 0 | 0.093760  | 4.263774  | 1.240364  |
| 43 | 6  | 0 | 0.197784  | 2.858984  | 1.306862  |
| 44 | 7  | 0 | 0.328858  | 2.069466  | 0.227951  |
| 45 | 1  | 0 | -0.172903 | 5.930015  | -0.100168 |
| 46 | 1  | 0 | 0.022180  | 4.833231  | 2.159179  |
| 47 | 1  | 0 | 0.105735  | 2.360268  | 2.259260  |
| 48 | 44 | 0 | 0.000000  | 0.000000  | 0.321625  |
| 49 | 6  | 0 | -0.426807 | -2.472986 | -3.443585 |
| 50 | 6  | 0 | -0.103038 | -4.060480 | -1.169455 |
| 51 | 6  | 0 | -0.705446 | -1.898296 | -2.200980 |
| 52 | 6  | 0 | 0.009757  | -3.810972 | -3.579900 |
| 53 | 6  | 0 | 0.098554  | -4.618467 | -2.462187 |
| 54 | 6  | 0 | -0.389181 | -2.662016 | -1.025896 |
| 55 | 6  | 0 | -1.531297 | -0.665515 | -2.161308 |
| 56 | 6  | 0 | -3.394571 | 1.381815  | -2.000737 |
| 57 | 6  | 0 | -2.429041 | -0.446574 | -3.219510 |
| 58 | 7  | 0 | -1.513365 | 0.174220  | -1.074845 |
| 59 | 6  | 0 | -2.482279 | 1.132636  | -0.960940 |
| 60 | 6  | 0 | -3.339395 | 0.607987  | -3.155932 |
| 61 | 7  | 0 | -2.568805 | 1.886208  | 0.223273  |
| 62 | 6  | 0 | -4.629646 | 3.060381  | 0.811601  |
| 63 | 6  | 0 | -4.445928 | 2.649908  | 2.273800  |
| 64 | 6  | 0 | -3.235797 | 3.206099  | 0.206122  |
| 65 | 6  | 0 | -2.447853 | 1.297260  | 1.489987  |
| 66 | 7  | 0 | -3.217716 | 1.852653  | 2.475163  |
| 67 | 7  | 0 | -1.578762 | 0.323490  | 1.709640  |
| 68 | 6  | 0 | -1.766092 | -0.546328 | 2.895764  |
| 69 | 6  | 0 | -2.857353 | -0.092808 | 3.872890  |
| 70 | 6  | 0 | -2.925692 | 1.430938  | 3.851801  |
| 71 | 1  | 0 | 0.344314  | -5.672713 | -2.547857 |
| 72 | 1  | 0 | 0.217799  | -4.206233 | -4.568316 |
| 73 | 1  | 0 | -0.573168 | -1.888921 | -4.345831 |
| 74 | 1  | 0 | -2.457942 | -1.127352 | -4.058808 |
| 75 | 1  | 0 | -4.040373 | 0.781125  | -3.964833 |
| 76 | 1  | 0 | -4.164280 | 2.133325  | -1.894953 |
| 77 | 1  | 0 | -3.245219 | 3.595370  | -0.811059 |
| 78 | 1  | 0 | -2.638998 | 3.897309  | 0.809783  |
| 79 | 1  | 0 | -4.352896 | 3.543298  | 2.902533  |
| 80 | 1  | 0 | -5.310614 | 2.078305  | 2.634704  |
| 81 | 1  | 0 | -5.183335 | 4.002363  | 0.760700  |
| 82 | 1  | 0 | -5.201051 | 2.306959  | 0.258571  |
| 83 | 1  | 0 | -3.714873 | 1.811111  | 4.503478  |
| 84 | 1  | 0 | -1.973007 | 1.866923  | 4.181055  |
| 85 | 1  | 0 | -2.632980 | -0.466581 | 4.876934  |
| 86 | 1  | 0 | -3.835080 | -0.492029 | 3.579067  |

|    |   |   |           |           |           |
|----|---|---|-----------|-----------|-----------|
| 87 | 1 | 0 | -0.805244 | -0.615422 | 3.415526  |
| 88 | 1 | 0 | -2.014510 | -1.549929 | 2.536112  |
| 89 | 6 | 0 | 0.000000  | -4.862933 | -0.000278 |
| 90 | 6 | 0 | -0.093760 | -4.263774 | 1.240364  |
| 91 | 6 | 0 | -0.197784 | -2.858984 | 1.306862  |
| 92 | 7 | 0 | -0.328858 | -2.069466 | 0.227951  |
| 93 | 1 | 0 | 0.172903  | -5.930015 | -0.100168 |
| 94 | 1 | 0 | -0.022180 | -4.833231 | 2.159179  |
| 95 | 1 | 0 | -0.105735 | -2.360268 | 2.259260  |

**Table S16** - Selected bond distances and angles of **6**

| Bond Length |              |             | Angle      |              |             |
|-------------|--------------|-------------|------------|--------------|-------------|
|             | Obs. (X-ray) | Calc. (DFT) |            | Obs. (X-ray) | Calc. (DFT) |
| N1-Ru1      | 2.085 (3)    | 2.09753     | N1-Ru1-N2  | 85.84 (13)   | 86.456      |
|             |              |             | N1-Ru1-N5  | 95.29 (14)   | 93.602      |
| N2-Ru1      | 2.056 (3)    | 2.06658     | N1-Ru1-N6  | 172.21 (12)  | 174.881     |
|             |              |             | N1-Ru1-N7  | 88.93 (13)   | 90.084      |
| N5-Ru1      | 2.091 (3)    | 2.12690     | N1-Ru1-N10 | 91.52 (12)   | 89.740      |
|             |              |             | N2-Ru1-N5  | 82.93 (13)   | 83.373      |
| N6-Ru1      | 2.097 (3)    | 2.09753     | N2-Ru1-N6  | 89.24 (13)   | 90.084      |
|             |              |             | N2-Ru1-N7  | 96.75 (12)   | 94.977      |
| N7-Ru1      | 2.035 (3)    | 2.06658     | N2-Ru1-N10 | 177.26 (13)  | 175.855     |
|             |              |             | N5-Ru1-N6  | 90.09 (14)   | 89.740      |
| N10-Ru1     | 2.094 (3)    | 2.12690     | N5-Ru1-N7  | 175.73 (14)  | 175.855     |
|             |              |             | N5-Ru1-N10 | 96.62 (12)   | 98.524      |
|             |              |             | N6-Ru1-N7  | 85.65 (13)   | 86.456      |
|             |              |             | N6-Ru1-N10 | 93.46 (12)   | 93.602      |
|             |              |             | N7-Ru1-N10 | 83.90 (12)   | 83.373      |



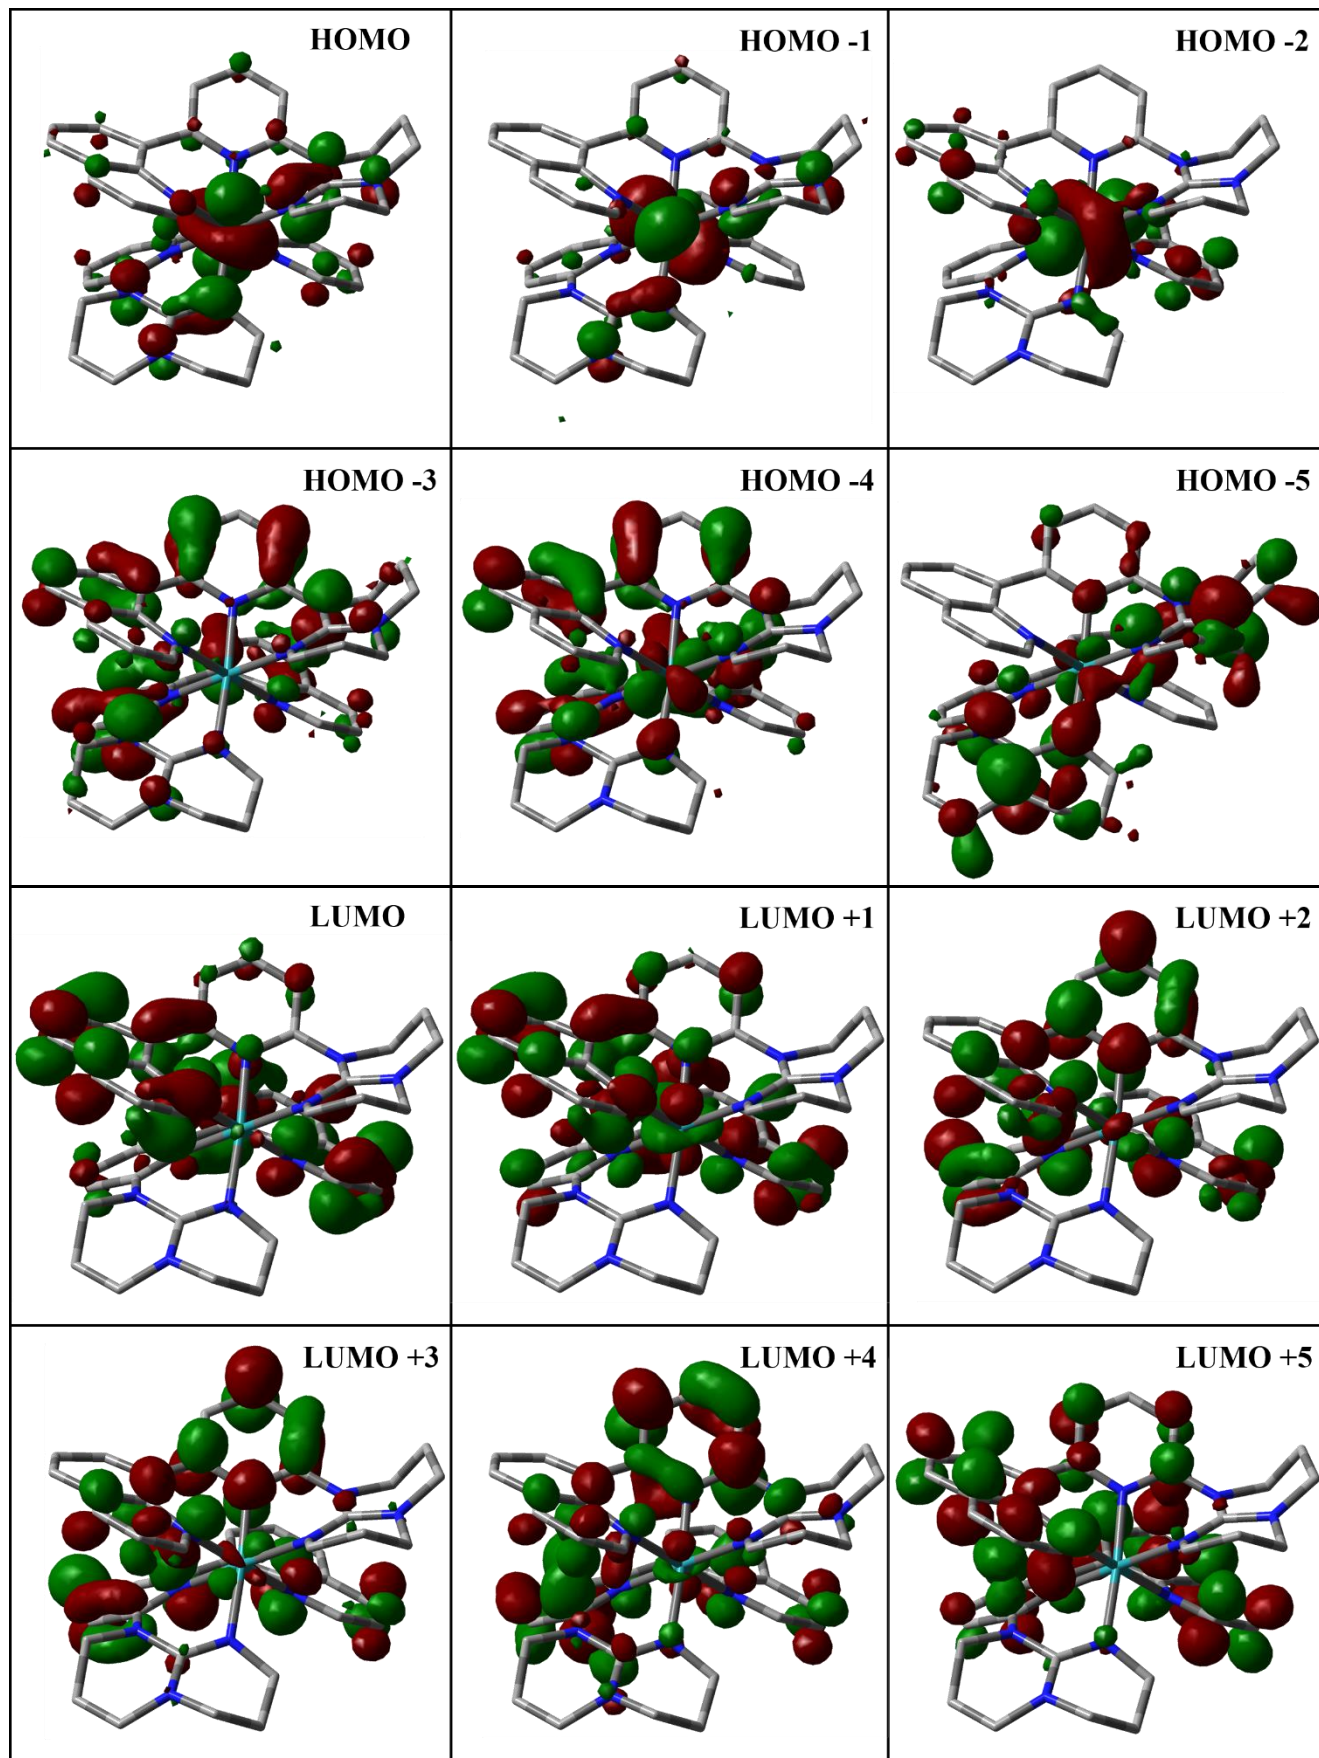

Figure S6 - Kohn-Sham electron density illustration of the the molecular orbitals for  $6^{2+}$  in ( $S = 0$ ) ground state.



**Table S17.** MO composition of **6** in (*S*=0) ground state.

| MO          | Energy (eV)   | Composition |           |           |           |
|-------------|---------------|-------------|-----------|-----------|-----------|
|             |               | Ruthenium   | QpyG      |           |           |
|             |               |             | Quinolyl  | pyridyl   | hpp       |
| LUMO+5      | -1.146        | 0           | 32        | 60        | 7         |
| LUMO+4      | -1.241        | 3           | 45        | 46        | 6         |
| LUMO+3      | -1.432        | 3           | 15        | 75        | 7         |
| LUMO+2      | -1.437        | 2           | 28        | 66        | 4         |
| LUMO+1      | -2.450        | 4           | 76        | 20        | 1         |
| <b>LUMO</b> | <b>-2.559</b> | <b>1</b>    | <b>80</b> | <b>18</b> | <b>1</b>  |
| <b>HOMO</b> | <b>-5.225</b> | <b>65</b>   | <b>3</b>  | <b>5</b>  | <b>28</b> |
| HOMO-1      | -5.634        | 72          | 4         | 3         | 21        |
| HOMO-2      | -5.872        | 84          | 12        | 2         | 3         |
| HOMO-3      | -6.762        | 19          | 6         | 6         | 70        |
| HOMO-4      | -6.782        | 1           | 35        | 26        | 38        |
| HOMO-5      | -6.791        | 15          | 21        | 9         | 55        |

**Table S18** - Selected transitions from TD-DFT calculations of **6**<sup>2+</sup> in the singlet ground state (PBE0), CPCM (CH<sub>3</sub>CN).

| Energy (eV) | $\lambda$ (nm) | f      | Transition                                                         | Character                                      |
|-------------|----------------|--------|--------------------------------------------------------------------|------------------------------------------------|
| 1.77        | 699            | 0.0697 | HOMO→LUMO (98%)                                                    | Ru to quino; hpp to quino                      |
| 2.50        | 496            | 0.1017 | H-2→LUMO (87%)                                                     | Ru to quino; Ru to py                          |
| 2.58        | 480            | 0.0758 | HOMO→L+2 (87%)                                                     | hpp to py and/or quino; Ru to py and/or quino  |
| 3.64        | 341            | 0.3708 | H-4→LUMO (35%)<br>H-3→L+1 (40%)<br>H-1→L+4 (15%)                   | Ru to quino; hpp to quino                      |
| 4.26        | 291            | 0.1118 | H-3→L+3 (78%)                                                      | hpp to py                                      |
| 4.39        | 282            | 0.0679 | H-8→LUMO (29%)<br>HOMO→L+8 (33%)                                   | hpp to py and/or quino; Ru to py and/or quino  |
| 4.81        | 258            | 0.0898 | HOMO→L+11 (44%)<br>HOMO→L+15 (23%)                                 | Ru to py; Ru to hpp; Ru to quino               |
| 5.10        | 243            | 0.1071 | H-11→LUMO (44%)<br>H-5→L+4 (12%)<br>H-3→L+7 (16%)                  | hpp to quino                                   |
| 5.23        | 237            | 0.1199 | H-11→LUMO (11%)<br>H-6→L+5 (31%)<br>H-4→L+6 (15%)<br>H-3→L+7 (11%) | Ru to quino; hpp to quino                      |
| 5.25        | 236            | 0.1895 | H-6→L+5 (44%)                                                      | hpp to py; hpp to quino                        |
| 5.33        | 232            | 0.1281 | H-8→L+3 (13%)<br>H-7→L+2 (36%)<br>H-1→L+11 (22%)                   | Ru to py; hpp to py                            |
| 5.35        | 232            | 0.1111 | H-7→L+3 (11%)<br>H-1→L+9 (11%)<br>H-1→L+10 (29%)<br>H-1→L+14 (26%) | Ru to py; Ru to quino                          |
| 5.47        | 227            | 0.1088 | H-10→L+2 (44%)<br>H-9→L+3 (28%)                                    | quino to py                                    |
| 5.48        | 226            | 0.0656 | H-9→L+2 (10%)<br>H-5→L+7 (57%)                                     | hpp to py; hpp to quino                        |
| 5.71        | 217            | 0.0687 | H-8→L+4 (79%)                                                      | hpp to py and/or quino ; Ru to py and/or quino |
| 5.86        | 212            | 0.1836 | H-16→L+1 (10%)<br>H-7→L+5 (52%)                                    | hpp to py; hpp to quino                        |
| 5.99        | 207            | 0.0650 | H-12→L+3 (32%)<br>H-8→L+6 (35%)                                    | hpp to py; hpp to quino                        |
| 6.01        | 206            | 0.1207 | H-16→L+1 (14%)<br>H-12→L+3 (35%)<br>H-8→L+6 (28%)                  | hpp to quino                                   |
| 6.14        | 202            | 0.4772 | H-10→L+5 (29%)<br>H-7→L+7 (25%)                                    | hpp to py                                      |

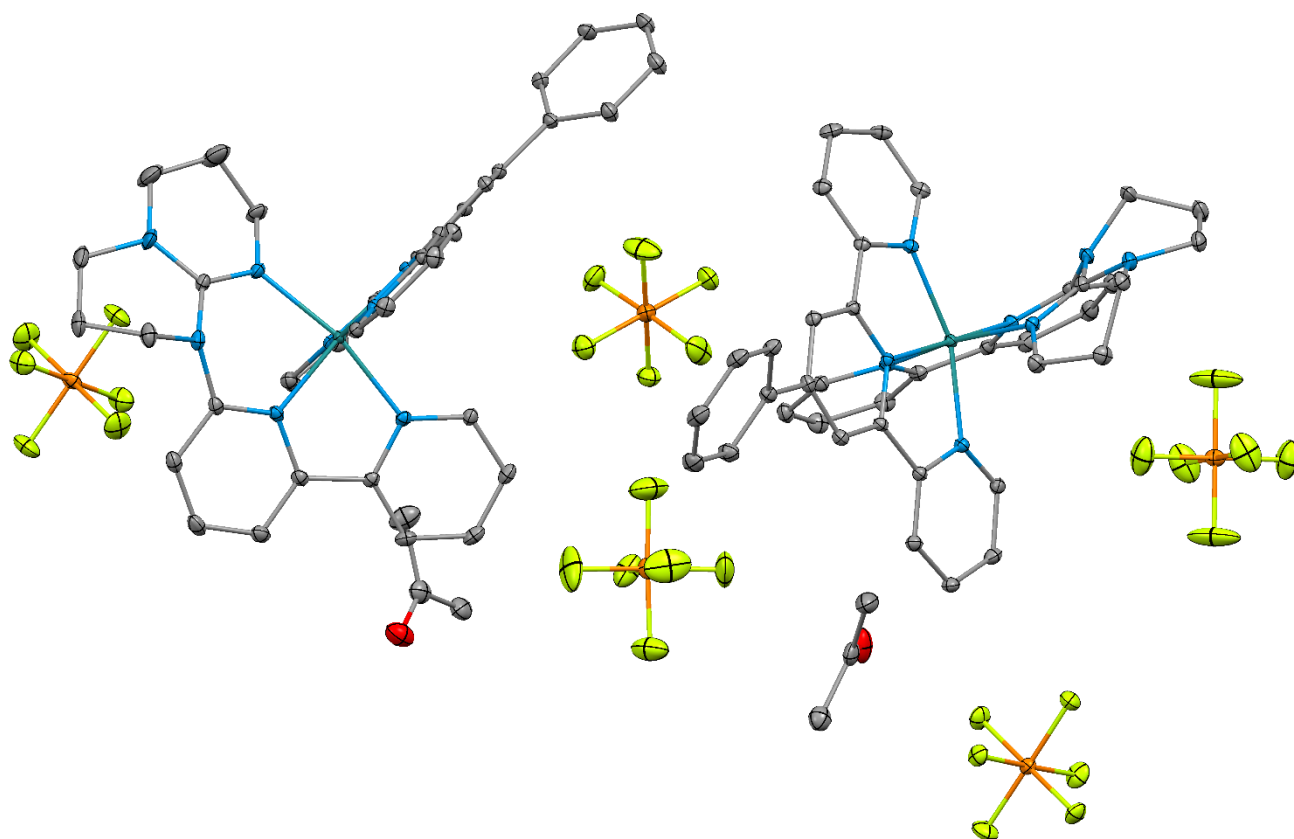

**Figure S7** – Thermal ellipsoid diagram (30% probability) of the single crystal of **7** with the counter-anions (PF<sub>6</sub>) and co-crystallized acetone solvent molecules. The hydrogens atoms are omitted for clarity.

**Table S19** – Atomic coordinates for DFT optimization of **7<sup>2+</sup>** in (*S* = 0) PBE0/LANL2DZ, CPCM(CH<sub>3</sub>CN).

| Standard orientation |               |             |                         |           |           |  |
|----------------------|---------------|-------------|-------------------------|-----------|-----------|--|
| Center Number        | Atomic Number | Atomic Type | Coordinates (Angstroms) |           |           |  |
|                      |               |             | X                       | Y         | Z         |  |
| 1                    | 44            | 0           | -0.654055               | 0.368963  | 0.124550  |  |
| 2                    | 7             | 0           | -2.633813               | 0.863454  | 0.239355  |  |
| 3                    | 7             | 0           | -0.375048               | -0.609646 | 1.922699  |  |
| 4                    | 7             | 0           | 1.291900                | 0.057585  | 0.058551  |  |
| 5                    | 7             | 0           | -0.528905               | 2.273126  | 0.915780  |  |
| 6                    | 7             | 0           | -0.189507               | 1.220156  | -1.724807 |  |
| 7                    | 7             | 0           | -1.152294               | -1.427787 | -0.820646 |  |
| 8                    | 7             | 0           | -3.398286               | -1.383749 | -0.021375 |  |
| 9                    | 6             | 0           | 1.887209                | -0.594997 | 1.095246  |  |
| 10                   | 6             | 0           | 1.161977                | 1.205931  | -2.005646 |  |
| 11                   | 6             | 0           | 2.005797                | 0.539397  | -0.996201 |  |
| 12                   | 6             | 0           | -3.655385               | -0.001670 | 0.022735  |  |
| 13                   | 6             | 0           | 0.934355                | -0.987725 | 2.147107  |  |
| 14                   | 7             | 0           | -2.580005               | -3.300934 | -1.081470 |  |
| 15                   | 6             | 0           | -1.315417               | -0.913535 | 2.847914  |  |
| 16                   | 1             | 0           | -2.325256               | -0.590261 | 2.630817  |  |

|    |   |   |           |           |           |
|----|---|---|-----------|-----------|-----------|
| 17 | 6 | 0 | -2.891712 | 2.188589  | 0.496701  |
| 18 | 6 | 0 | -1.710734 | 2.970264  | 0.890040  |
| 19 | 6 | 0 | 3.388568  | 0.357189  | -1.042263 |
| 20 | 1 | 0 | 3.956128  | 0.712250  | -1.893614 |
| 21 | 6 | 0 | 0.599067  | 2.895723  | 1.337308  |
| 22 | 1 | 0 | 1.505715  | 2.305425  | 1.351199  |
| 23 | 6 | 0 | -2.327531 | -2.017185 | -0.675497 |
| 24 | 6 | 0 | 1.293504  | -1.682705 | 3.307442  |
| 25 | 1 | 0 | 2.323205  | -1.977148 | 3.470940  |
| 26 | 6 | 0 | 0.767835  | 2.365076  | -4.091755 |
| 27 | 1 | 0 | 1.140144  | 2.811446  | -5.006942 |
| 28 | 6 | 0 | -1.010453 | -1.603675 | 4.023285  |
| 29 | 1 | 0 | -1.798375 | -1.824940 | 4.733402  |
| 30 | 6 | 0 | -1.759970 | 4.318060  | 1.271393  |
| 31 | 1 | 0 | -2.695421 | 4.862619  | 1.244320  |
| 32 | 6 | 0 | -4.442908 | -2.298440 | 0.500426  |
| 33 | 1 | 0 | -5.184583 | -1.718746 | 1.048124  |
| 34 | 1 | 0 | -3.970885 | -2.982041 | 1.216513  |
| 35 | 6 | 0 | 1.656301  | 1.778382  | -3.181990 |
| 36 | 1 | 0 | 2.719065  | 1.766060  | -3.391466 |
| 37 | 6 | 0 | -3.912797 | -3.917926 | -1.264522 |
| 38 | 1 | 0 | -3.876706 | -4.895787 | -0.769771 |
| 39 | 1 | 0 | -4.078215 | -4.094472 | -2.334999 |
| 40 | 6 | 0 | 0.314809  | -1.997101 | 4.256929  |
| 41 | 1 | 0 | 0.581580  | -2.536355 | 5.158821  |
| 42 | 6 | 0 | -1.042706 | 1.780956  | -2.610518 |
| 43 | 1 | 0 | -2.093932 | 1.756881  | -2.351417 |
| 44 | 6 | 0 | -4.190120 | 2.698238  | 0.453616  |
| 45 | 1 | 0 | -4.387120 | 3.742220  | 0.658421  |
| 46 | 6 | 0 | -4.978167 | 0.475774  | -0.075956 |
| 47 | 1 | 0 | -5.785737 | -0.198162 | -0.329822 |
| 48 | 6 | 0 | -0.603314 | 2.362573  | -3.803714 |
| 49 | 1 | 0 | -1.324083 | 2.800870  | -4.483560 |
| 50 | 6 | 0 | -0.592812 | 4.959299  | 1.696453  |
| 51 | 1 | 0 | -0.619162 | 6.001552  | 1.993624  |
| 52 | 6 | 0 | 4.044902  | -0.321642 | 0.008094  |
| 53 | 6 | 0 | 3.269391  | -0.796420 | 1.088132  |
| 54 | 1 | 0 | 3.750811  | -1.291705 | 1.922587  |
| 55 | 6 | 0 | 7.478854  | -1.863964 | 0.534329  |
| 56 | 1 | 0 | 7.906397  | -2.757801 | 0.978258  |
| 57 | 6 | 0 | -0.587117 | -3.244208 | -2.477318 |
| 58 | 1 | 0 | 0.275145  | -3.805430 | -2.850506 |
| 59 | 1 | 0 | -1.181386 | -2.923348 | -3.340916 |
| 60 | 6 | 0 | 0.605888  | 4.232126  | 1.737365  |
| 61 | 1 | 0 | 1.531861  | 4.686846  | 2.068510  |

|    |   |   |           |           |           |
|----|---|---|-----------|-----------|-----------|
| 62 | 6 | 0 | 5.512071  | -0.524029 | -0.020070 |
| 63 | 6 | 0 | -1.448926 | -4.109396 | -1.566071 |
| 64 | 1 | 0 | -1.854356 | -4.972241 | -2.098474 |
| 65 | 1 | 0 | -0.862247 | -4.481427 | -0.715720 |
| 66 | 6 | 0 | -0.105159 | -2.046077 | -1.665976 |
| 67 | 1 | 0 | 0.716548  | -2.356612 | -1.009094 |
| 68 | 1 | 0 | 0.288931  | -1.276745 | -2.336131 |
| 69 | 6 | 0 | -5.039054 | -3.076980 | -0.664319 |
| 70 | 1 | 0 | -5.452185 | -2.380843 | -1.402123 |
| 71 | 1 | 0 | -5.850431 | -3.730184 | -0.330590 |
| 72 | 6 | 0 | 6.091724  | -1.671923 | 0.560752  |
| 73 | 1 | 0 | 5.460756  | -2.433453 | 1.009969  |
| 74 | 6 | 0 | -5.240187 | 1.829728  | 0.130942  |
| 75 | 1 | 0 | -6.254298 | 2.203558  | 0.047765  |
| 76 | 6 | 0 | 7.746809  | 0.235950  | -0.651980 |
| 77 | 1 | 0 | 8.384116  | 0.982961  | -1.115250 |
| 78 | 6 | 0 | 6.359458  | 0.426999  | -0.627546 |
| 79 | 1 | 0 | 5.943488  | 1.333526  | -1.058052 |
| 80 | 6 | 0 | 8.312988  | -0.910564 | -0.071615 |
| 81 | 1 | 0 | 9.388380  | -1.058868 | -0.091165 |

Table S20 - Selected bond distances and angles of 7

| Bond Length |              |             | Angle       |              |             |
|-------------|--------------|-------------|-------------|--------------|-------------|
|             | Obs. (X-ray) | Calc. (DFT) |             | Obs. (X-ray) | Calc. (DFT) |
| N1-Ru1      | 2.072 (2)    | 2.06612     | N1-Ru1-N2   | 79.55 (8)    | 79.692      |
|             |              |             | N1-Ru1-N3   | 159.00 (8)   | 159.035     |
| N2-Ru1      | 1.957 (2)    | 1.97181     | N1-Ru1-N4   | 83.87 (8)    | 87.134      |
|             |              |             | N1-Ru1-N5   | 100.39 (8)   | 101.333     |
| N3-Ru1      | 2.059 (2)    | 2.08817     | N1-Ru1-N7   | 91.61 (8)    | 91.065      |
|             |              |             | N2-Ru1-N3   | 79.87 (8)    | 79.349      |
| N4-Ru1      | 2.048 (2)    | 2.06580     | N2-Ru1-N4   | 97.31 (8)    | 95.658      |
|             |              |             | N2-Ru1-N5   | 176.59 (8)   | 174.903     |
| N5-Ru1      | 2.026 (2)    | 2.04381     | N2-Ru1-N7   | 93.95 (8)    | 94.839      |
|             |              |             | N3-Ru1-N4   | 94.63 (8)    | 95.455      |
| N7-Ru1      | 2.076 (2)    | 2.09044     | N3-Ru1-N5   | 99.91 (8)    | 99.591      |
|             |              |             | N3-Ru1-N7   | 93.95 (8)    | 90.168      |
| N9-Ru2      | 2.071 (2)    | 2.06612     | N4-Ru1-N5   | 79.31 (9)    | 79.920      |
|             |              |             | N4-Ru1-N7   | 166.89 (8)   | 168.485     |
| N10-Ru2     | 1.960 (2)    | 1.97181     | N5-Ru1-N7   | 89.46 (9)    | 90.142      |
|             |              |             | N9-Ru2-N10  | 79.73 (8)    | 79.692      |
| N11-Ru2     | 2.066 (2)    | 2.08817     | N9-Ru2-N11  | 159.38 (8)   | 159.035     |
|             |              |             | N9-Ru2-N12  | 86.30 (8)    | 87.134      |
| N12-Ru2     | 2.056 (2)    | 2.06580     | N9-Ru2-N13  | 100.02 (8)   | 101.333     |
|             |              |             | N9-Ru2-N15  | 88.65 (8)    | 91.065      |
| N13-Ru2     | 2.032 (2)    | 2.04381     | N10-Ru2-N11 | 79.65 (9)    | 79.349      |
|             |              |             | N10-Ru2-N12 | 96.19 (8)    | 95.658      |
| N15-Ru2     | 2.084 (2)    | 2.09044     | N10-Ru2-N13 | 175.40 (8)   | 174.903     |
|             |              |             | N10-Ru2-N15 | 95.10 (8)    | 94.839      |
|             |              |             | N11-Ru2-N12 | 95.57 (8)    | 95.455      |
|             |              |             | N11-Ru2-N13 | 100.50 (8)   | 99.591      |
|             |              |             | N11-Ru2-N15 | 93.53 (8)    | 90.168      |
|             |              |             | N12-Ru2-N13 | 79.22 (9)    | 79.920      |
|             |              |             | N12-Ru2-N15 | 166.61 (8)   | 168.485     |
|             |              |             | N13-Ru2-N15 | 89.48 (9)    | 90.142      |

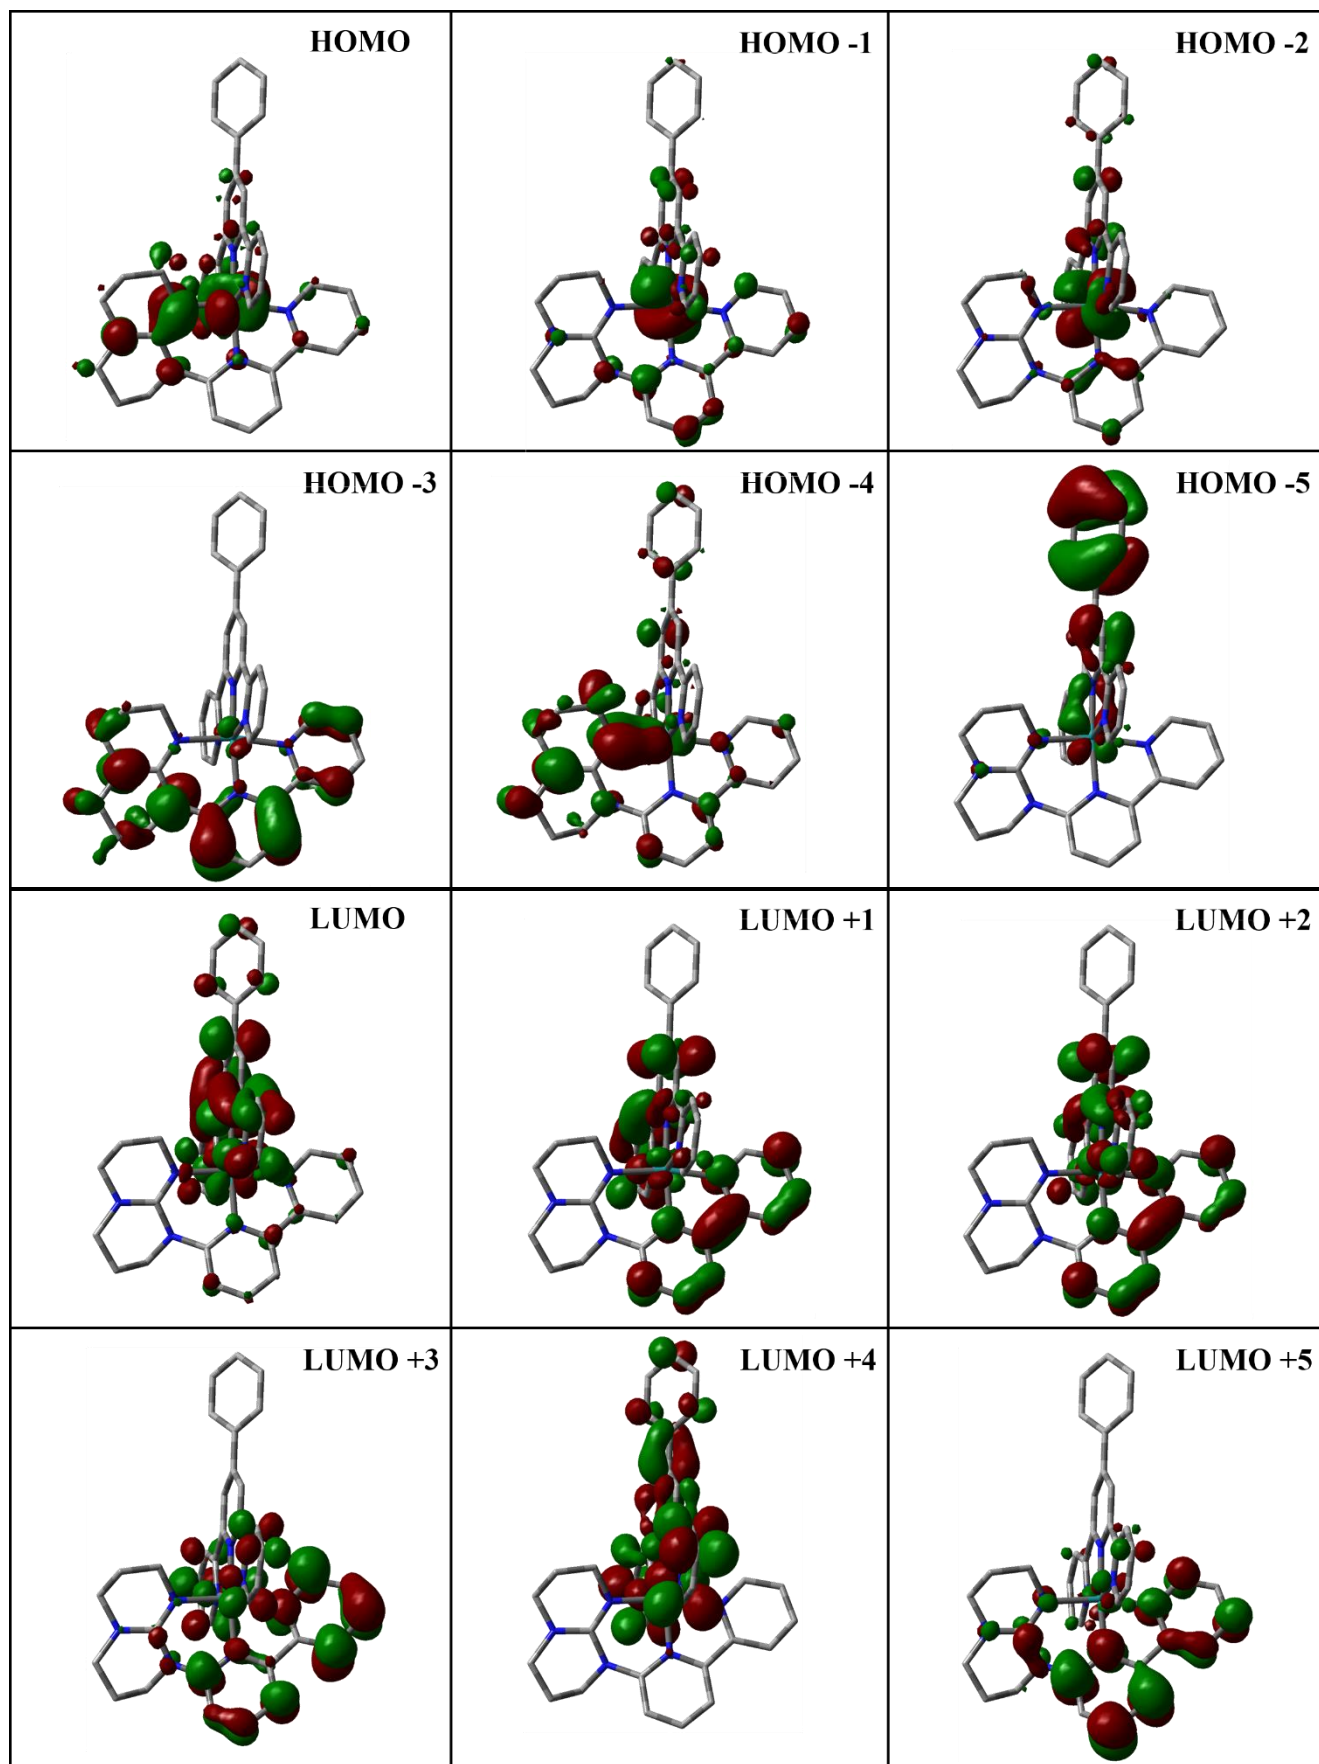

Figure S8 - Kohn-Sham electron density illustration of the the molecular orbitals for  $7^{2+}$  in ( $S = 0$ ) ground state.

**Table S21.** MO composition of **7** in ( $S=0$ ) ground state.

| MO          | Energy (eV)   | Composition |           |                |           |
|-------------|---------------|-------------|-----------|----------------|-----------|
|             |               | Ruthenium   | Phtpy     | bpyhpp         |           |
|             |               |             |           | 2,2'-bipyridyl | hpp       |
| LUMO+5      | -1.442        | 2           | 10        | 82             | 6         |
| LUMO+4      | -1.592        | 0           | 97        | 2              | 0         |
| LUMO+3      | -1.613        | 1           | 31        | 65             | 2         |
| LUMO+2      | -2.444        | 6           | 53        | 41             | 0         |
| LUMO+1      | -2.554        | 3           | 53        | 44             | 0         |
| <b>LUMO</b> | <b>-2.731</b> | <b>7</b>    | <b>83</b> | <b>9</b>       | <b>1</b>  |
| <b>HOMO</b> | <b>-5.822</b> | <b>54</b>   | <b>13</b> | <b>5</b>       | <b>26</b> |
| HOMO-1      | -6.302        | 67          | 17        | 13             | 4         |
| HOMO-2      | -6.425        | 74          | 17        | 6              | 3         |
| HOMO-3      | -7.203        | 3           | 1         | 45             | 46        |
| HOMO-4      | -7.247        | 13          | 16        | 10             | 52        |
| HOMO-5      | -7.620        | 8           | 87        | 2              | 3         |

**Table S22** - Selected transitions from TD-DFT calculations of **7<sup>2+</sup>** in the singlet ground state (PBE0), CPCM (CH<sub>3</sub>CN).

| Energy (eV) | $\lambda$ (nm) | f      | Transition                                                       | Character                                             |
|-------------|----------------|--------|------------------------------------------------------------------|-------------------------------------------------------|
| 2.03        | 609            | 0.0232 | H→L (89%)                                                        | hpp to tpy ; Ru to tpy                                |
| 2.42        | 512            | 0.0201 | H→L+1 (30%)<br>H→L+2 (58%)                                       | hpp to bpy &/or hpp to tpy ; Ru to bpy &/or Ru to tpy |
| 2.69        | 461            | 0.1855 | H-2→L (45%)<br>H-1→L (22%)<br>H-1→L+2 (20%)                      | Ru to bpy ; Ru to tpy                                 |
| 2.83        | 439            | 0.0901 | H-2→L+1 (18%)<br>H-1→L+1 (63%)                                   | Ru to bpy ; Ru to tpy                                 |
| 3.05        | 407            | 0.0232 | H-2→L (10%)<br>H-1→L+2 (62%)                                     | Ru to bpy ; Ru to tpy                                 |
| 3.39        | 366            | 0.0782 | H→L+4 (80%)                                                      | hpp to bpy &/or hpp to tpy ; Ru to bpy &/or Ru to tpy |
| 4.13        | 300            | 0.1472 | H-6→L (19%)<br>H-3→L+2 (35%)                                     | hpp to bpy &/or hpp to tpy ; Ru to bpy &/or Ru to tpy |
| 4.18        | 296            | 0.2858 | H-6→L (15%)<br>H-5→L (39%)                                       | hpp to bpy &/or hpp to tpy ; Ru to bpy &/or Ru to tpy |
| 4.26        | 291            | 0.2005 | H-6→L (18%)<br>H-5→L (48%)                                       | Ru to bpy ; Ru to tpy                                 |
| 4.64        | 267            | 0.1589 | H-6→L+2 (22%)<br>H-5→L+1 (10%)<br>H-5→L+2 (33%)                  | tpy to bpy                                            |
| 4.65        | 267            | 0.1825 | H-6→L+2 (37%)<br>H-5→L+1 (18%)<br>H-5→L+2 (20%)                  | tpy to bpy                                            |
| 4.99        | 249            | 0.1126 | H-8→L+1 (34%)<br>H-3→L+4 (41%)                                   | hpp to tpy ; bpy to tpy                               |
| 4.99        | 248            | 0.1285 | H-8→L+1 (11%)<br>H-4→L+5 (29%)<br>H-3→L+4 (27%)<br>H-3→L+5 (11%) | hpp to tpy ; hpp to bpy                               |
| 5.21        | 238            | 0.1311 | H-9→L+1 (47%)                                                    | hpp to bpy ; tpy to bpy                               |

**Table S23** – Atomic coordinates for DFT optimization of **8<sup>2+</sup>** in (S = 0) PBE0/LANL2DZ, CPCM(CH<sub>3</sub>CN).

| Standard orientation |               |             |                         |           |           |  |
|----------------------|---------------|-------------|-------------------------|-----------|-----------|--|
| Center Number        | Atomic Number | Atomic Type | Coordinates (Angstroms) |           |           |  |
|                      |               |             | X                       | Y         | Z         |  |
| 1                    | 44            | 0           | -0.556957               | -0.178514 | 0.005764  |  |
| 2                    | 6             | 0           | -4.908829               | -0.001579 | 0.266023  |  |
| 3                    | 6             | 0           | -5.249301               | -1.316149 | 0.011031  |  |
| 4                    | 7             | 0           | -2.580600               | -0.470827 | -0.047601 |  |
| 5                    | 6             | 0           | -4.245547               | -2.248727 | -0.350821 |  |
| 6                    | 6             | 0           | -3.549328               | 0.432086  | 0.201168  |  |
| 7                    | 6             | 0           | -2.919753               | -1.772429 | -0.354237 |  |
| 8                    | 6             | 0           | -4.502477               | -3.614354 | -0.713516 |  |
| 9                    | 6             | 0           | -3.478637               | -4.446249 | -1.094029 |  |
| 10                   | 6             | 0           | -2.122171               | -3.970853 | -1.137518 |  |
| 11                   | 6             | 0           | -1.026395               | -4.766692 | -1.557393 |  |
| 12                   | 6             | 0           | -1.853483               | -2.635031 | -0.751971 |  |
| 13                   | 6             | 0           | 0.246583                | -4.210110 | -1.581209 |  |
| 14                   | 6             | 0           | 0.434773                | -2.871233 | -1.180983 |  |
| 15                   | 7             | 0           | -0.585143               | -2.097297 | -0.771964 |  |
| 16                   | 7             | 0           | -3.255893               | 1.807769  | 0.317106  |  |
| 17                   | 6             | 0           | -4.045833               | 4.162413  | -0.092440 |  |
| 18                   | 7             | 0           | -2.084967               | 3.663978  | 1.218529  |  |
| 19                   | 6             | 0           | -3.331050               | 4.444760  | 1.218359  |  |
| 20                   | 6             | 0           | -2.051806               | 2.353527  | 0.816320  |  |
| 21                   | 6             | 0           | -4.405826               | 2.689112  | -0.072842 |  |
| 22                   | 7             | 0           | -0.943331               | 1.633865  | 0.940331  |  |
| 23                   | 6             | 0           | 0.410060                | 3.661483  | 1.221395  |  |
| 24                   | 6             | 0           | -0.859916               | 4.483630  | 1.392320  |  |
| 25                   | 6             | 0           | 0.115288                | 2.263043  | 1.755951  |  |
| 26                   | 1             | 0           | -3.395675               | 4.418399  | -0.935866 |  |
| 27                   | 1             | 0           | -4.968882               | 4.742306  | -0.182972 |  |
| 28                   | 1             | 0           | -5.690678               | 0.692884  | 0.533096  |  |
| 29                   | 1             | 0           | -4.769177               | 2.351632  | -1.047901 |  |
| 30                   | 1             | 0           | -6.286117               | -1.629138 | 0.077514  |  |
| 31                   | 1             | 0           | -5.526728               | -3.973570 | -0.691338 |  |
| 32                   | 1             | 0           | -3.678429               | -5.475210 | -1.376534 |  |
| 33                   | 1             | 0           | -1.189637               | -5.796288 | -1.859005 |  |
| 34                   | 1             | 0           | 1.105808                | -4.787097 | -1.901599 |  |
| 35                   | 1             | 0           | 1.420898                | -2.425086 | -1.193056 |  |
| 36                   | 1             | 0           | -5.209855               | 2.565927  | 0.659697  |  |
| 37                   | 1             | 0           | -3.961237               | 4.174812  | 2.075276  |  |
| 38                   | 1             | 0           | -3.065085               | 5.498236  | 1.319994  |  |
| 39                   | 1             | 0           | -0.894876               | 5.308526  | 0.669332  |  |
| 40                   | 1             | 0           | -0.899885               | 4.919819  | 2.397309  |  |
| 41                   | 1             | 0           | 1.232624                | 4.133538  | 1.767195  |  |

|    |   |   |           |           |           |
|----|---|---|-----------|-----------|-----------|
| 42 | 1 | 0 | 0.700165  | 3.591799  | 0.167425  |
| 43 | 1 | 0 | -0.214773 | 2.328866  | 2.803520  |
| 44 | 1 | 0 | 1.002786  | 1.636185  | 1.729465  |
| 45 | 7 | 0 | -0.254170 | 0.747060  | -1.817727 |
| 46 | 6 | 0 | 0.478384  | 2.015954  | -4.206064 |
| 47 | 6 | 0 | 1.077153  | 0.979791  | -2.102876 |
| 48 | 6 | 0 | -1.195819 | 1.137919  | -2.708518 |
| 49 | 6 | 0 | -0.870124 | 1.773304  | -3.909032 |
| 50 | 6 | 0 | 1.457897  | 1.612432  | -3.291613 |
| 51 | 7 | 0 | 1.409990  | -0.053251 | -0.004063 |
| 52 | 6 | 0 | 4.187434  | 0.041451  | -0.067968 |
| 53 | 6 | 0 | 2.026750  | 0.511247  | -1.079441 |
| 54 | 6 | 0 | 2.113867  | -0.579073 | 1.038053  |
| 55 | 6 | 0 | 3.509212  | -0.541879 | 1.024913  |
| 56 | 6 | 0 | 3.421398  | 0.569304  | -1.129834 |
| 57 | 7 | 0 | -0.108989 | -1.015436 | 1.863224  |
| 58 | 6 | 0 | 0.815162  | -2.138095 | 4.252852  |
| 59 | 6 | 0 | -0.981314 | -1.453085 | 2.798346  |
| 60 | 6 | 0 | 1.245865  | -1.117621 | 2.102450  |
| 61 | 6 | 0 | 1.723488  | -1.679600 | 3.291069  |
| 62 | 6 | 0 | -0.558981 | -2.019707 | 4.004429  |
| 63 | 6 | 0 | 5.667371  | 0.095982  | -0.099561 |
| 64 | 6 | 0 | 8.492061  | 0.203663  | -0.159721 |
| 65 | 6 | 0 | 6.439455  | -0.924906 | 0.494432  |
| 66 | 6 | 0 | 6.333914  | 1.171691  | -0.723563 |
| 67 | 6 | 0 | 7.733173  | 1.225780  | -0.752352 |
| 68 | 6 | 0 | 7.838815  | -0.872097 | 0.463267  |
| 69 | 1 | 0 | 8.417204  | -1.671134 | 0.916942  |
| 70 | 1 | 0 | 9.576795  | 0.244949  | -0.182677 |
| 71 | 1 | 0 | 8.229083  | 2.066123  | -1.228498 |
| 72 | 1 | 0 | 5.763505  | 1.984734  | -1.163315 |
| 73 | 1 | 0 | 5.952186  | -1.778121 | 0.957778  |
| 74 | 1 | 0 | 4.072754  | -0.934795 | 1.862430  |
| 75 | 1 | 0 | 3.917119  | 0.995178  | -1.993717 |
| 76 | 1 | 0 | 2.789040  | -1.756904 | 3.469751  |
| 77 | 1 | 0 | 1.174531  | -2.575450 | 5.177540  |
| 78 | 1 | 0 | -2.033275 | -1.341339 | 2.566931  |
| 79 | 1 | 0 | -1.294237 | -2.358010 | 4.724702  |
| 80 | 1 | 0 | 2.505195  | 1.790389  | -3.504271 |
| 81 | 1 | 0 | 0.762368  | 2.508253  | -5.129289 |
| 82 | 1 | 0 | -1.659992 | 2.068776  | -4.589369 |
| 83 | 1 | 0 | -2.224762 | 0.929796  | -2.444207 |

---



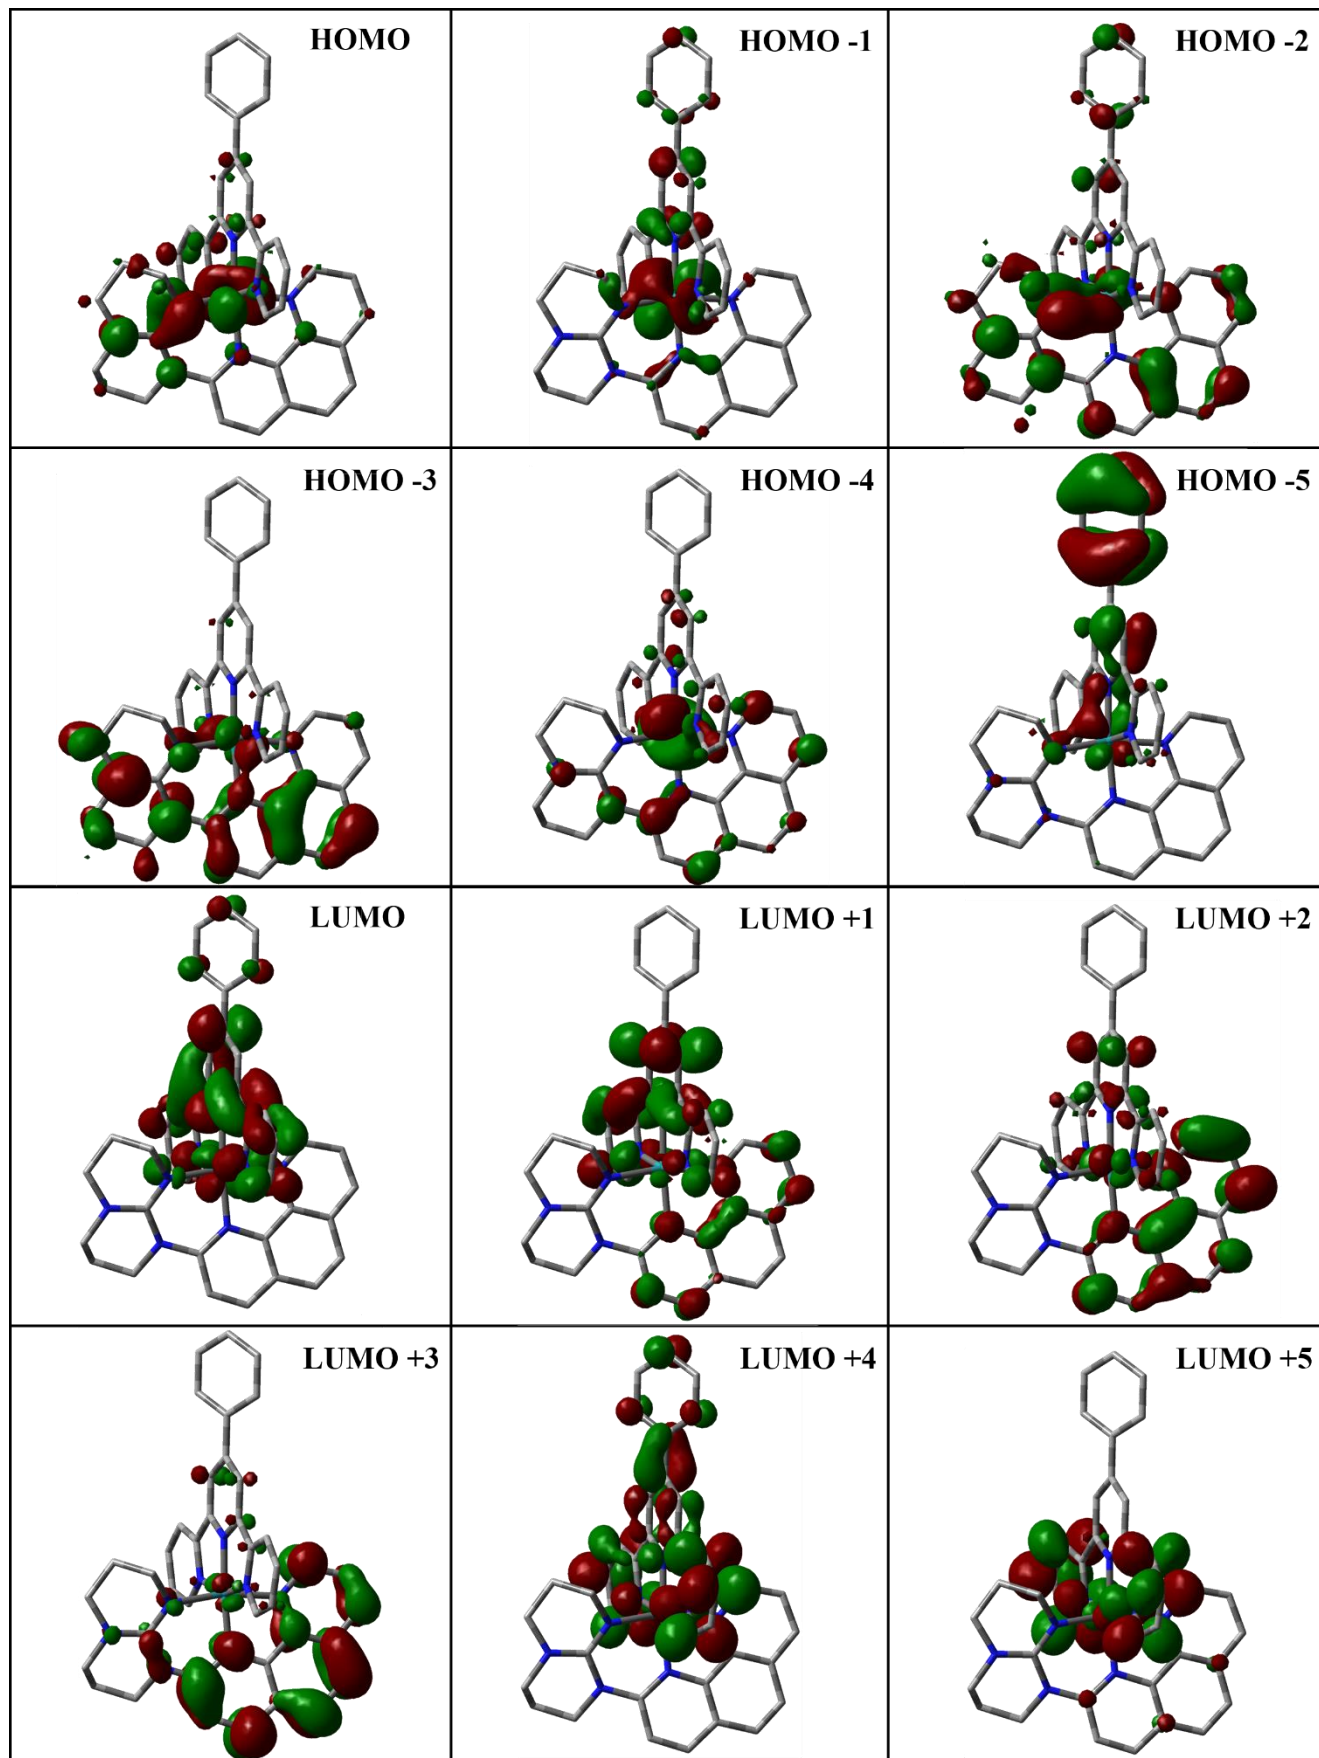

Figure S9 - Kohn-Sham electron density illustration of the the molecular orbitals for  $8^{2+}$  in ( $S = 0$ ) ground state.

**Table S24.** MO composition of **8** in ( $S=0$ ) ground state.

| MO          | Energy (eV)   | Composition |           |                     |           |
|-------------|---------------|-------------|-----------|---------------------|-----------|
|             |               | Ruthenium   | Phtpy     | phenG               |           |
|             |               |             |           | 1,10-phenanthroline | hpp       |
| LUMO+5      | -1.205        | 2           | 90        | 7                   | 1         |
| LUMO+4      | -1.238        | 1           | 98        | 1                   | 0         |
| LUMO+3      | -2.261        | 3           | 14        | 82                  | 0         |
| LUMO+2      | -2.308        | 2           | 59        | 37                  | 3         |
| LUMO+1      | -2.325        | 3           | 64        | 32                  | 1         |
| <b>LUMO</b> | <b>-2.421</b> | <b>1</b>    | <b>58</b> | <b>38</b>           | <b>2</b>  |
| <b>HOMO</b> | <b>-5.599</b> | <b>61</b>   | <b>8</b>  | <b>3</b>            | <b>28</b> |
| HOMO-1      | -6.080        | 71          | 8         | 14                  | 7         |
| HOMO-2      | -6.284        | 83          | 10        | 4                   | 3         |
| HOMO-3      | -7.129        | 9           | 2         | 39                  | 49        |
| HOMO-4      | -7.193        | 19          | 5         | 22                  | 54        |
| HOMO-5      | -7.621        | 0           | 92        | 5                   | 2         |

**Table S25-** Selected transitions from TD-DFT calculations of **8<sup>2+</sup>** in the singlet ground state (PBE0), CPCM (CH<sub>3</sub>CN).

| Energy (eV) | $\lambda$ (nm) | f      | Transition                                         | Character                                      |
|-------------|----------------|--------|----------------------------------------------------|------------------------------------------------|
| 2.00        | 620            | 0,0222 | HOMO→LUMO (92%)                                    | hpp to tpy ; Ru to tpy                         |
| 2.31        | 536            | 0,0106 | HOMO→L+1 (47%)<br>HOMO→L+2 (38%)                   | hpp to tpy and/or phen ; Ru to tpy and/or phen |
| 2.38        | 520            | 0,0174 | H-1→LUMO (34%)<br>HOMO→L+1 (19%)<br>HOMO→L+2 (41%) | hpp to tpy and/or phen ; Ru to tpy and/or phen |
| 2.62        | 474            | 0,0023 | HOMO→L+3 (88%)                                     | hpp to phen ; Ru to phen                       |
| 2.68        | 463            | 0,1446 | H-2→LUMO (53%)<br>H-1→L+2 (19%)                    | Ru to tpy; Ru to phen                          |
| 2.80        | 443            | 0,1314 | H-1→L+1 (86%)                                      | Ru to tpy                                      |
| 2.85        | 435            | 0,0165 | H-2→L+1 (37%)<br>H-2→L+2 (52%)                     | Ru to tpy; Ru to phen                          |
| 2.89        | 428            | 0,0244 | H-2→L+1 (56%)<br>H-2→L+2 (36%)                     | Ru to tpy; Ru to phen                          |
| 3.03        | 409            | 0,0762 | H-2→LUMO (10%)<br>H-1→L+2 (62%)                    | Ru to tpy; Ru to phen                          |
| 3.13        | 396            | 0,0351 | H-2→L+3 (10%)<br>H-1→L+3 (81%)                     | Ru to phen                                     |
| 3.22        | 386            | 0,0291 | H-2→L+3 (74%)                                      | Ru to phen                                     |
| 3.35        | 370            | 0,081  | HOMO→L+4 (91%)                                     | Ru to tpy; hpp to tpy                          |
| 4.63        | 268            | 0,1625 | H-6→L+1 (15%)<br>H-6→L+2 (52%)                     | tpy to phen                                    |
| 4.67        | 265            | 0,1307 | HOMO→L+9 (60%)                                     | Ru to phen; hpp to phen                        |
| 5.43        | 228            | 0,2827 | H-11→LUMO (15%)<br>H-9→L+3 (52%)                   | hpp to phen; hpp to tpy                        |
| 5.56        | 223            | 0,2513 | H-4→L+7 (10%)<br>H-3→L+7 (38%)                     | hpp to phen                                    |

**Table S26 –** Atomic coordinates for DFT optimization of **9<sup>3+</sup>** in ( $S = 1$ ) PBE0/LANL2DZ, CPCM(CH<sub>3</sub>CN).

| Standard orientation |               |             |                         |           |           |  |
|----------------------|---------------|-------------|-------------------------|-----------|-----------|--|
| Center Number        | Atomic Number | Atomic Type | Coordinates (Angstroms) |           |           |  |
|                      |               |             | X                       | Y         | Z         |  |
| 1                    | 44            | 0           | 0.658189                | 0.062898  | -0.036072 |  |
| 2                    | 7             | 0           | 2.735650                | 0.051053  | -0.076768 |  |
| 3                    | 7             | 0           | 0.297281                | -1.107042 | -1.744856 |  |

|    |   |   |           |           |           |
|----|---|---|-----------|-----------|-----------|
| 4  | 7 | 0 | -1.330971 | 0.034689  | -0.052956 |
| 5  | 7 | 0 | 0.230981  | 1.339338  | 1.561271  |
| 6  | 7 | 0 | 0.739799  | -1.508696 | 1.202729  |
| 7  | 7 | 0 | 2.622982  | -2.343027 | 0.038204  |
| 8  | 6 | 0 | -1.958201 | -0.775320 | -0.944918 |
| 9  | 6 | 0 | -1.119328 | 1.573103  | 1.727383  |
| 10 | 6 | 0 | -2.005560 | 0.810749  | 0.831877  |
| 11 | 6 | 0 | 3.378470  | -1.148977 | -0.020384 |
| 12 | 6 | 0 | -1.034055 | -1.435070 | -1.892343 |
| 13 | 7 | 0 | 1.368654  | -3.782316 | 1.393727  |
| 14 | 6 | 0 | 1.197911  | -1.547027 | -2.648547 |
| 15 | 6 | 0 | 3.463765  | 1.209734  | -0.188394 |
| 16 | 6 | 0 | -3.401166 | 0.778763  | 0.855057  |
| 17 | 6 | 0 | 1.564971  | -2.541556 | 0.913169  |
| 18 | 6 | 0 | -1.450624 | -2.276652 | -2.924000 |
| 19 | 6 | 0 | -0.656370 | 3.076160  | 3.561798  |
| 20 | 6 | 0 | 0.833215  | -2.379391 | -3.711511 |
| 21 | 6 | 0 | 3.164418  | -3.569485 | -0.602666 |
| 22 | 6 | 0 | -1.577878 | 2.448240  | 2.714402  |
| 23 | 6 | 0 | 2.307632  | -4.923647 | 1.263255  |
| 24 | 6 | 0 | -0.506106 | -2.764314 | -3.838826 |
| 25 | 6 | 0 | 1.114181  | 1.928318  | 2.397240  |
| 26 | 6 | 0 | 4.861444  | 1.151241  | -0.301601 |
| 27 | 6 | 0 | 4.777226  | -1.238380 | -0.057044 |
| 28 | 6 | 0 | 0.707688  | 2.801385  | 3.410074  |
| 29 | 6 | 0 | -4.096972 | -0.064568 | -0.038153 |
| 30 | 6 | 0 | -3.348369 | -0.846627 | -0.950559 |
| 31 | 6 | 0 | -7.639705 | -1.381909 | -0.373294 |
| 32 | 6 | 0 | -0.025880 | -2.889694 | 3.168024  |
| 33 | 6 | 0 | -5.573104 | -0.128459 | -0.028720 |
| 34 | 6 | 0 | 0.157458  | -4.048770 | 2.198554  |
| 35 | 6 | 0 | -0.187110 | -1.607186 | 2.358389  |
| 36 | 6 | 0 | 3.565201  | -4.562850 | 0.480640  |
| 37 | 6 | 0 | -6.241534 | -1.319443 | -0.385792 |
| 38 | 6 | 0 | 5.522771  | -0.074793 | -0.214727 |
| 39 | 6 | 0 | -7.737896 | 0.937120  | 0.342106  |
| 40 | 6 | 0 | -6.339645 | 0.998790  | 0.337156  |
| 41 | 6 | 0 | -8.393446 | -0.253618 | -0.011275 |
| 42 | 6 | 0 | -0.613157 | 3.362784  | -2.571450 |
| 43 | 6 | 0 | 0.155462  | 4.421510  | -2.129625 |
| 44 | 7 | 0 | 0.693927  | 1.814184  | -1.247978 |
| 45 | 6 | 0 | 1.273098  | 4.174998  | -1.286938 |
| 46 | 6 | 0 | -0.332826 | 2.076355  | -2.070563 |
| 47 | 6 | 0 | 1.586280  | 2.823128  | -0.927287 |
| 48 | 6 | 0 | 2.079149  | 5.244392  | -0.811984 |

|    |   |   |           |           |           |
|----|---|---|-----------|-----------|-----------|
| 49 | 6 | 0 | 3.180304  | 4.977589  | -0.021863 |
| 50 | 6 | 0 | 3.559806  | 3.637788  | 0.218091  |
| 51 | 6 | 0 | 2.821989  | 2.548554  | -0.255777 |
| 52 | 1 | 0 | -0.986797 | 1.255471  | -2.329871 |
| 53 | 1 | 0 | -1.453554 | 3.500019  | -3.239733 |
| 54 | 1 | 0 | -0.075122 | 5.441290  | -2.421053 |
| 55 | 1 | 0 | 1.811492  | 6.262796  | -1.075853 |
| 56 | 1 | 0 | 3.784099  | 5.782870  | 0.380605  |
| 57 | 1 | 0 | 4.465620  | 3.458953  | 0.787189  |
| 58 | 1 | 0 | 5.427274  | 2.055471  | -0.477155 |
| 59 | 1 | 0 | 6.604330  | -0.120342 | -0.267214 |
| 60 | 1 | 0 | 5.271527  | -2.194282 | 0.048315  |
| 61 | 1 | 0 | 3.990730  | -3.294463 | -1.255724 |
| 62 | 1 | 0 | 3.989014  | -5.467977 | 0.038112  |
| 63 | 1 | 0 | 4.324386  | -4.123668 | 1.135812  |
| 64 | 1 | 0 | 2.375191  | -3.991887 | -1.235331 |
| 65 | 1 | 0 | 2.555662  | -5.266099 | 2.273384  |
| 66 | 1 | 0 | 1.758871  | -5.728437 | 0.761310  |
| 67 | 1 | 0 | 0.308807  | -4.993470 | 2.722631  |
| 68 | 1 | 0 | -0.709112 | -4.159593 | 1.535721  |
| 69 | 1 | 0 | -0.916157 | -3.038509 | 3.785064  |
| 70 | 1 | 0 | 0.840827  | -2.832640 | 3.835285  |
| 71 | 1 | 0 | -1.210106 | -1.550227 | 1.971511  |
| 72 | 1 | 0 | -0.024323 | -0.735680 | 2.997585  |
| 73 | 1 | 0 | 2.157753  | 1.682698  | 2.258408  |
| 74 | 1 | 0 | 1.450809  | 3.248686  | 4.058460  |
| 75 | 1 | 0 | -1.001006 | 3.756523  | 4.331847  |
| 76 | 1 | 0 | -2.637682 | 2.636505  | 2.830847  |
| 77 | 1 | 0 | 2.220132  | -1.217276 | -2.520827 |
| 78 | 1 | 0 | 1.587334  | -2.710898 | -4.414301 |
| 79 | 1 | 0 | -0.818410 | -3.418681 | -4.644494 |
| 80 | 1 | 0 | -2.494776 | -2.543948 | -3.027835 |
| 81 | 1 | 0 | -3.859268 | -1.468675 | -1.674020 |
| 82 | 1 | 0 | -8.139057 | -2.308259 | -0.638948 |
| 83 | 1 | 0 | -5.676208 | -2.210254 | -0.643655 |
| 84 | 1 | 0 | -3.948253 | 1.371059  | 1.577164  |
| 85 | 1 | 0 | -5.851483 | 1.935945  | 0.587679  |
| 86 | 1 | 0 | -8.314057 | 1.815914  | 0.613830  |
| 87 | 1 | 0 | -9.477979 | -0.301505 | -0.004997 |

---

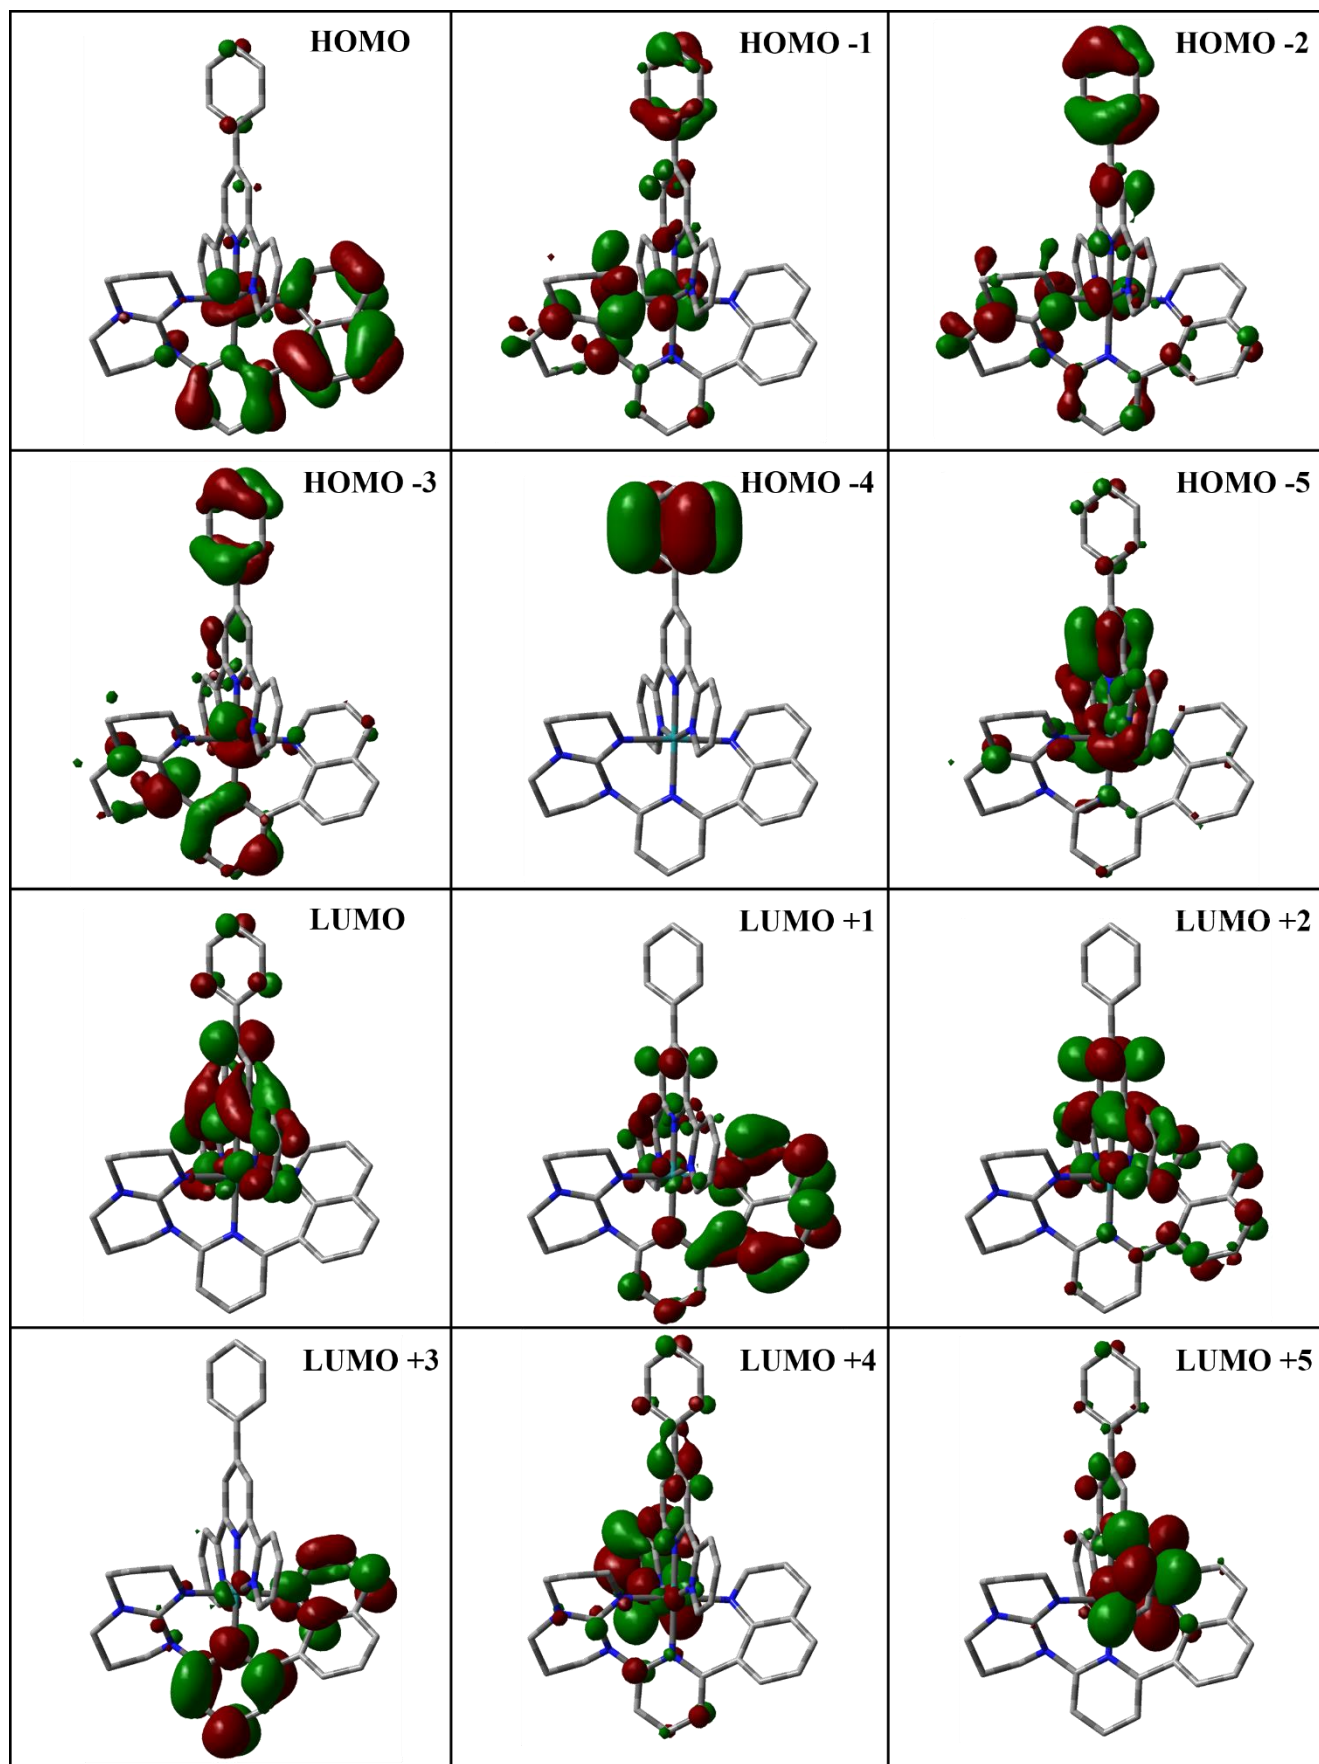

Figure S10 - Kohn-Sham electron density illustration of the the molecular orbitals for  $9^{3+}$  in ( $S = 1$ ) ground state in  $\alpha$ -spin

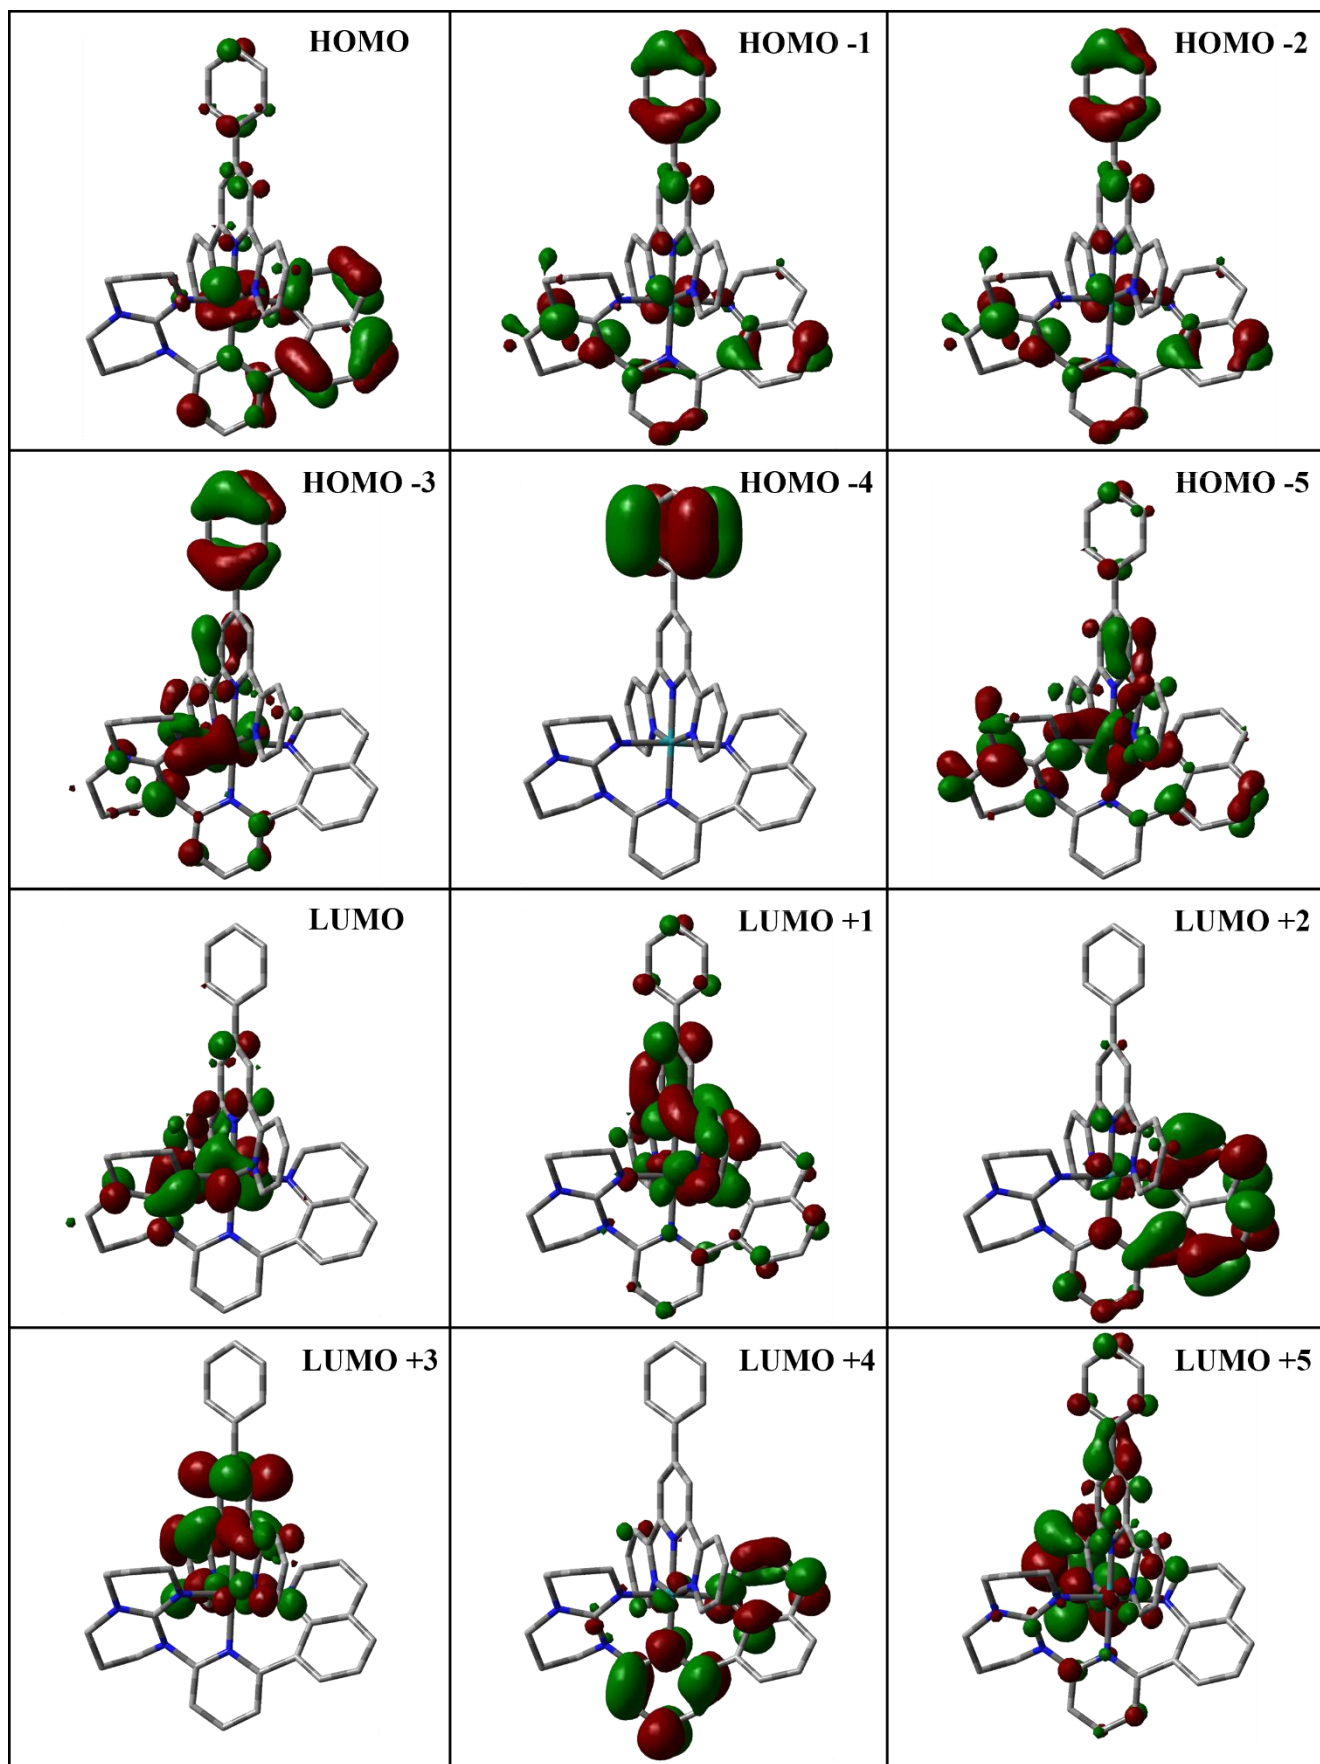

Figure S11 - Kohn-Sham electron density illustration of the the molecular orbitals for  $9^{3+}$  in ( $S = 1$ ) ground state in  $\beta$ -spin

**Table S27.** MO composition of **9** in ( $S=1$ ) ground state in  $\alpha$ -spin.

| MO          | Energy (eV)   | Composition |           |           |           |           |
|-------------|---------------|-------------|-----------|-----------|-----------|-----------|
|             |               | Ruthenium   | Phtpy     | QpyG      |           |           |
|             |               |             |           | Quino     | py        | hpp       |
| LUMO+5      | -2.061        | 42          | 7         | 18        | 21        | 11        |
| LUMO+4      | -2.083        | 2           | 2         | 13        | 72        | 11        |
| LUMO+3      | -2.686        | 55          | 34        | 4         | 4         | 3         |
| LUMO+2      | -2.853        | 3           | 87        | 7         | 2         | 0         |
| LUMO+1      | -2.949        | 6           | 91        | 2         | 0         | 0         |
| <b>LUMO</b> | <b>-3.089</b> | <b>3</b>    | <b>13</b> | <b>65</b> | <b>19</b> | <b>1</b>  |
| <b>HOMO</b> | <b>-7.398</b> | <b>4</b>    | <b>1</b>  | <b>58</b> | <b>26</b> | <b>10</b> |
| HOMO-1      | -7.556        | 12          | 3         | 0         | 0         | 84        |
| HOMO-2      | -7.748        | 6           | 83        | 1         | 3         | 7         |
| HOMO-3      | -7.822        | 100         | 0         | 0         | 0         | 0         |
| HOMO-4      | -7.909        | 16          | 21        | 13        | 15        | 35        |
| HOMO-5      | -8.069        | 1           | 95        | 1         | 1         | 2         |

**Table S28.** MO composition of **9** in ( $S=1$ ) ground state in  $\beta$ -spin.

| MO          | Energy (eV)   | Composition |           |           |           |           |
|-------------|---------------|-------------|-----------|-----------|-----------|-----------|
|             |               | Ruthenium   | Phtpy     | QpyG      |           |           |
|             |               |             |           | Quino     | py        | hpp       |
| LUMO+5      | -2.047        | 2           | 2         | 15        | 72        | 9         |
| LUMO+4      | -2.373        | 60          | 29        | 4         | 3         | 4         |
| LUMO+3      | -2.833        | 4           | 81        | 13        | 2         | 0         |
| LUMO+2      | -2.864        | 4           | 94        | 1         | 0         | 1         |
| LUMO+1      | -3.079        | 1           | 16        | 64        | 18        | 1         |
| <b>LUMO</b> | <b>-4.758</b> | <b>67</b>   | <b>10</b> | <b>1</b>  | <b>3</b>  | <b>19</b> |
| <b>HOMO</b> | <b>-7.321</b> | <b>17</b>   | <b>3</b>  | <b>45</b> | <b>17</b> | <b>17</b> |
| HOMO-1      | -7.447        | 14          | 3         | 9         | 15        | 60        |
| HOMO-2      | -7.746        | 15          | 81        | 0         | 1         | 2         |
| HOMO-3      | -7.820        | 0           | 100       | 0         | 0         | 0         |
| HOMO-4      | -7.898        | 29          | 26        | 9         | 9         | 25        |
| HOMO-5      | -8.013        | 29          | 51        | 5         | 2         | 13        |

**Table S29-** Selected transitions from TD-DFT calculations of  $9^{3+}$  in ( $S=1$ ) ground state (PBE0), CPCM ( $CH_3CN$ ).

| Energy (eV) | $\lambda$ (nm) | f      | Transition                                                                                                                                                        | Character                                                                             |
|-------------|----------------|--------|-------------------------------------------------------------------------------------------------------------------------------------------------------------------|---------------------------------------------------------------------------------------|
| 2.02        | 614            | 0.0079 | H-3( $\beta$ ) $\rightarrow$ LUMO( $\beta$ ) (12%)<br>H-1( $\beta$ ) $\rightarrow$ LUMO( $\beta$ ) (59%)<br>HOMO( $\beta$ ) $\rightarrow$ LUMO( $\beta$ ) (22%)   | tpy to Ru; py to Ru; Q to Ru                                                          |
| 2.13        | 581            | 0.1432 | H-5( $\beta$ ) $\rightarrow$ LUMO( $\beta$ ) (30%)<br>H-3( $\beta$ ) $\rightarrow$ LUMO( $\beta$ ) (32%)<br>H-1( $\beta$ ) $\rightarrow$ LUMO( $\beta$ ) (13%)    | tpy to Ru; py to Ru; Q to Ru; hpp to Ru                                               |
| 2.44        | 508            | 0.0224 | H-5( $\beta$ ) $\rightarrow$ LUMO( $\beta$ ) (30%) H-3( $\beta$ ) $\rightarrow$ LUMO( $\beta$ ) (12%) H-2( $\beta$ ) $\rightarrow$ LUMO( $\beta$ ) (13%)          | py to Ru; Q to Ru; hpp to Ru                                                          |
| 2.54        | 488            | 0.0325 | H-6( $\beta$ ) $\rightarrow$ LUMO( $\beta$ ) (56%) H-3( $\beta$ ) $\rightarrow$ LUMO( $\beta$ ) (18%)                                                             | tpy to Ru                                                                             |
| 3.14        | 394            | 0.0675 | HOMO( $\alpha$ ) $\rightarrow$ LUMO( $\alpha$ ) (24%)<br>HOMO( $\beta$ ) $\rightarrow$ L+1( $\beta$ ) (19%)                                                       | Ru to tpy; py to tpy; Q to tpy; hpp to tpy                                            |
| 3.75        | 331            | 0.1043 | H-3( $\beta$ ) $\rightarrow$ L+1( $\beta$ ) (22%)                                                                                                                 | Ru to tpy; hpp to tpy                                                                 |
| 4.01        | 309            | 0.0305 | H-5( $\beta$ ) $\rightarrow$ L+1( $\beta$ ) (20%)<br>H-1( $\beta$ ) $\rightarrow$ L+3( $\beta$ ) (17%)                                                            | Ru to tpy; hpp to tpy                                                                 |
| 4.02        | 309            | 0.0499 | H-6( $\beta$ ) $\rightarrow$ L+1( $\beta$ ) (12%)                                                                                                                 | Ru to tpy and/or Ru to Q; hpp to tpy and/or hpp to Q                                  |
| 4.08        | 304            | 0.0444 | H-12( $\beta$ ) $\rightarrow$ LUMO( $\beta$ ) (14%) H-6( $\beta$ ) $\rightarrow$ L+1( $\beta$ ) (16%)<br>H-3( $\beta$ ) $\rightarrow$ L+3( $\beta$ ) (16%)        | hpp to tpy                                                                            |
| 4.16        | 298            | 0.0602 | H-12( $\beta$ ) $\rightarrow$ LUMO( $\beta$ ) (31%) H-3( $\beta$ ) $\rightarrow$ L+2( $\beta$ ) (12%)                                                             | tpy to Ru and/or tpy to Q; hpp to Ru and/or hpp to Q                                  |
| 4.32        | 287            | 0.0368 | H-8( $\alpha$ ) $\rightarrow$ LUMO( $\alpha$ ) (30%)                                                                                                              | Ru to tpy; hpp to tpy; Q to tpy                                                       |
| 4.55        | 272            | 0.0434 | H-1( $\alpha$ ) $\rightarrow$ L+4( $\alpha$ ) (12%)                                                                                                               | Ru to tpy and/or Ru to Q and/or Ru to py; hpp to tpy and/or hpp to Q and/or hpp to py |
| 4.59        | 270            | 0.0737 | H-1( $\alpha$ ) $\rightarrow$ L+5( $\alpha$ ) (13%)<br>HOMO( $\alpha$ ) $\rightarrow$ L+4( $\alpha$ ) (11%)                                                       | Ru to tpy; hpp to tpy; Q to tpy                                                       |
| 4.64        | 267            | 0.0324 | H-8( $\alpha$ ) $\rightarrow$ L+1( $\alpha$ ) (21%)<br>H-8( $\beta$ ) $\rightarrow$ L+2( $\beta$ ) (30%)                                                          | Ru to py and/or hpp to py; Ru to Q and/or hpp to Q                                    |
| 4.66        | 266            | 0.0364 | H-16( $\beta$ ) $\rightarrow$ L( $\beta$ ) (13%) H-2( $\beta$ ) $\rightarrow$ L+5( $\beta$ ) (26%)                                                                | Ru to tpy; hpp to tpy; Q to tpy                                                       |
| 4.67        | 265            | 0.0569 | H-16( $\beta$ ) $\rightarrow$ LUMO( $\beta$ ) (15%)<br>H-2( $\beta$ ) $\rightarrow$ L+5( $\beta$ ) (13%)                                                          | Q to tpy; hpp to tpy                                                                  |
| 4.70        | 264            | 0.0295 | H-5( $\alpha$ ) $\rightarrow$ L+3( $\alpha$ ) (12%)                                                                                                               | Ru to py; tpy to py; hpp to py                                                        |
| 4.71        | 263            | 0.0868 | H-2( $\beta$ ) $\rightarrow$ L+6( $\beta$ ) (10%)                                                                                                                 | Ru to tpy; hpp to tpy; Q to tpy                                                       |
| 4.91        | 253            | 0.119  | HOMO( $\beta$ ) $\rightarrow$ L+8( $\beta$ ) (15%)                                                                                                                | Ru to tpy and/or hpp to tpy; Ru to py and/or hpp to py                                |
| 4.96        | 250            | 0.0311 | H-3( $\alpha$ ) $\rightarrow$ L+4( $\alpha$ ) (10%)                                                                                                               | Ru to tpy; hpp to tpy                                                                 |
| 4.98        | 249            | 0.0291 | H-2( $\alpha$ ) $\rightarrow$ L+5( $\alpha$ ) (12%)<br>HOMO( $\beta$ ) $\rightarrow$ L+8( $\beta$ ) (14%)                                                         | Ru to tpy; Q to tpy; hpp to tpy                                                       |
| 5.02        | 247            | 0.0455 | H-9( $\beta$ ) $\rightarrow$ L+1( $\beta$ ) (12%)                                                                                                                 | Ru to tpy and/or hpp to tpy ; Ru to py and/or hpp to py                               |
| 5.04        | 246            | 0.0339 | H-5( $\alpha$ ) $\rightarrow$ L+5( $\alpha$ ) (14%)<br>H-3( $\alpha$ ) $\rightarrow$ L+5( $\alpha$ ) (17%)<br>H-1( $\alpha$ ) $\rightarrow$ L+7( $\alpha$ ) (23%) | Ru to py; hpp to py                                                                   |
| 5.11        | 242            | 0.0811 | H-2( $\alpha$ ) $\rightarrow$ L+6( $\alpha$ ) (23%)                                                                                                               | Ru to tpy; QpyG to tpy                                                                |
| 5.13        | 242            | 0.0319 | H-9( $\alpha$ ) $\rightarrow$ L+2( $\alpha$ ) (12%)<br>HOMO( $\alpha$ ) $\rightarrow$ L+7( $\alpha$ ) (16%)                                                       | Ru to Q; hpp to Q                                                                     |
| 5.15        | 241            | 0.0557 | H-3( $\beta$ ) $\rightarrow$ L+6( $\beta$ ) (11%)<br>HOMO( $\beta$ ) $\rightarrow$ L+9( $\beta$ ) (18%)                                                           | py to hpp; Q to hpp                                                                   |



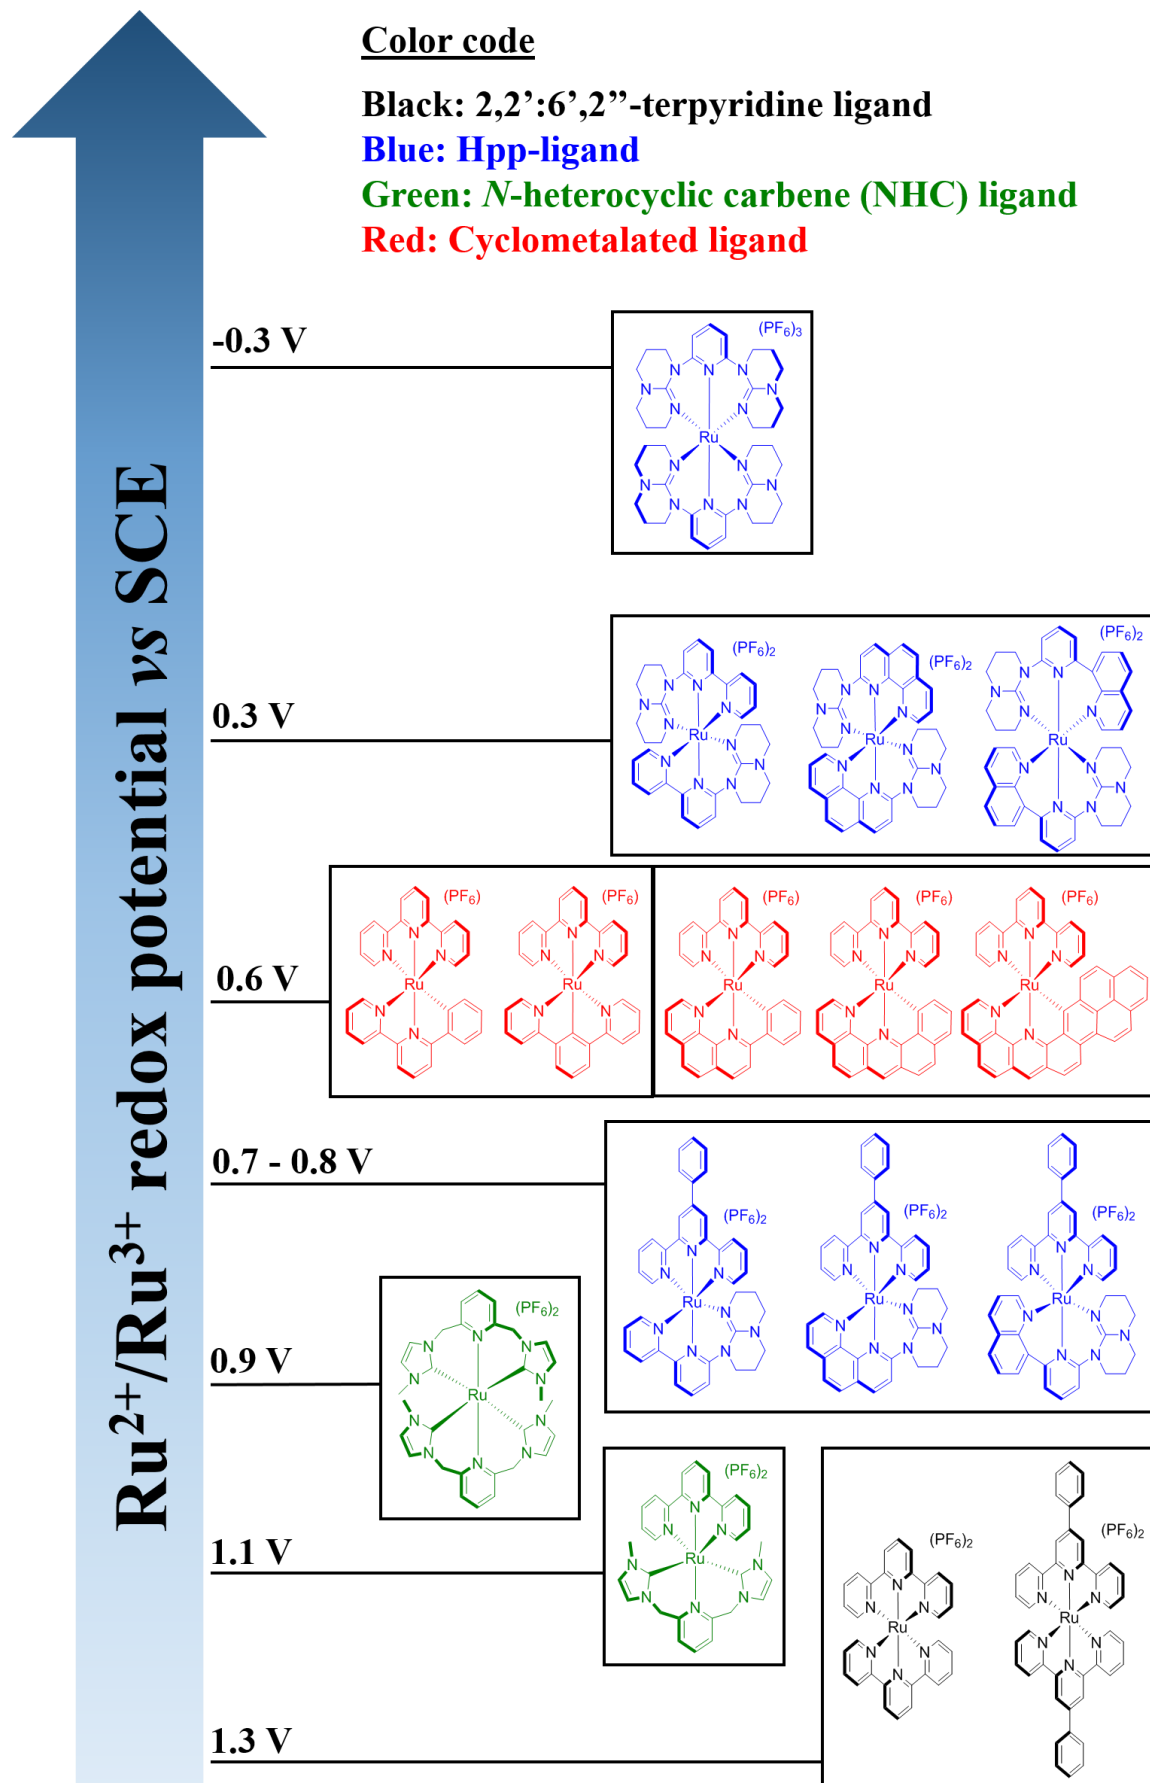

Figure S12 -  $Ru^{2+}/Ru^{3+}$  redox potentials comparison.

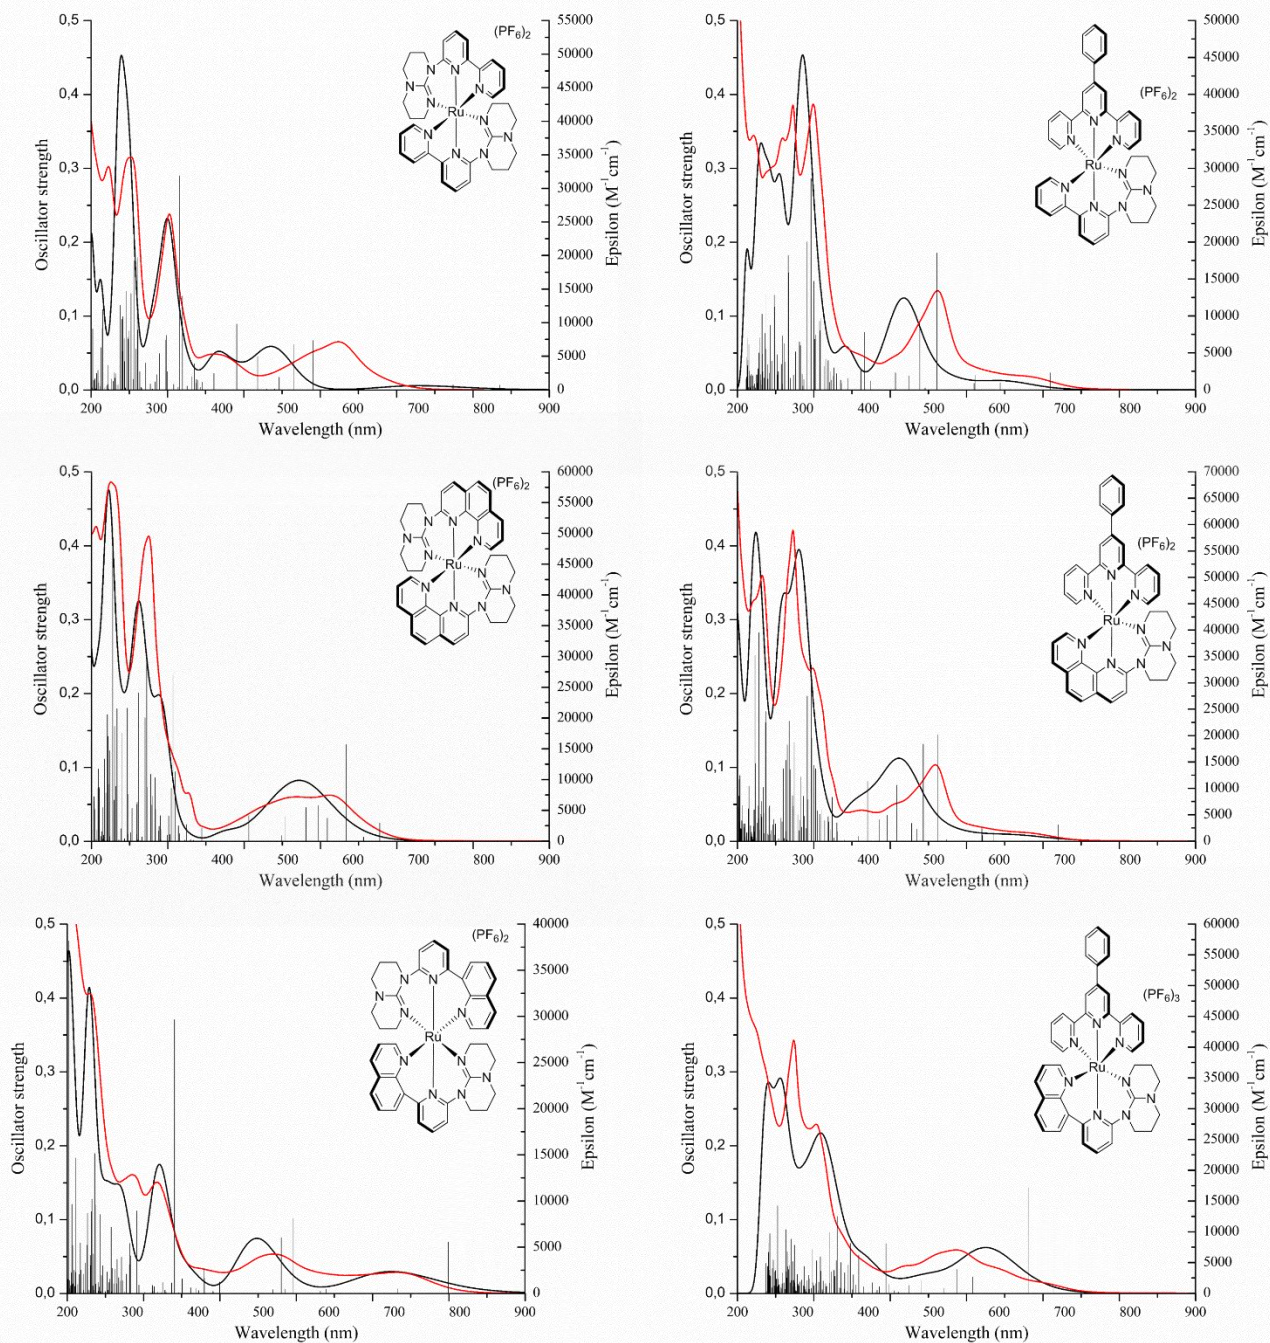

**Figure S13** - Comparison of the experimental (red) absorption spectra recorded in acetonitrile and the TD-DFT (black) simulated (PBE0/LANL2DZ; CPCM: CH<sub>3</sub>CN) absorption spectrum for the homoleptic complexes **4-6** (left) and heteroleptic complexes **7-9** (right).

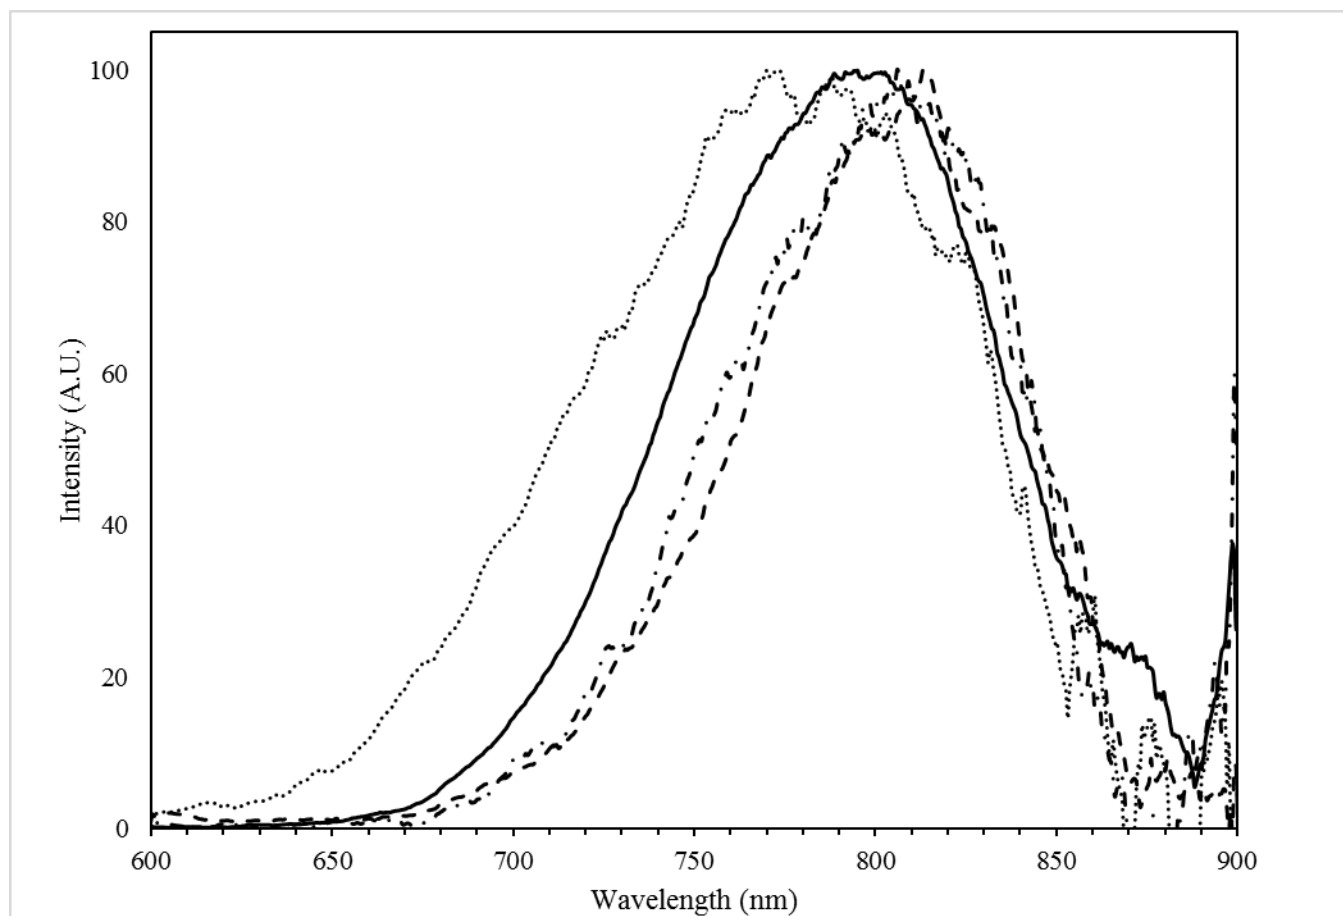

**Figure S14** – Normalized luminescence spectra of the homoleptic complexes **4** (plain) and **5** (dots) as well as the heteroleptic complexes **7** (dash) and **8** (dash-dots) obtained in deaerated MeCN solution at ambient temperature.

#### 4. References

- [1] N. G. Connelly, W. E. Geiger, *Chem. Rev.* **1996**, *96*, 877-910.
- [2] I. P. Evans, A. Spencer, G. Wilkinson, *J. Chem. Soc., Dalton Trans.* **1973**, 204-209.
- [3] Y. Q. Fang, G. S. Hanan, *Synlett* **2003**, *6*, 852-854.
- [4] F. Ferretti, E. Gallo, F. Ragaini, *J. Organomet. Chem.* **2014**, *771*, 59-67.
- [5] D. J. Wasylenko, C. Ganesamoorthy, B. D. Koivisto, M. A. Henderson, C. P. Berlinguette, *Inorg. Chem.* **2010**, *49*, 2202-2209.
